# Supplementary material
Source: PubMed Central journal article supplement (PMC5866563)
Supplement: pnas.1716137115.sapp.pdf [file pnas.1716137115.sapp.pdf]

# Supporting Information

**Sequeira *et al.***

## **Convergence of marine megafauna movement patterns in coastal and open oceans**

### **Contents**

|                                                              | <b>Page no</b> |
|--------------------------------------------------------------|----------------|
| Supporting Materials and Methods _____                       | 2              |
| Supporting Acknowledgments _____                             | 5              |
| Supporting Figures (S1-S6) _____                             | 6              |
| Supporting Tables (S1-S5) _____                              | 15             |
| Supporting Information for accessing the datasets used _____ | 28             |
| Supporting References _____                                  | 33             |

## ***Supporting Materials and Methods***

**Tracking datasets.** The mean number of individual tracks per species was 53.4 (median = 24 tracks), ranging from 2 to 321 (for pilot whales and Northern elephant seals, respectively), with tracks collected over periods ranging from < 1 to 14 years (median = years; Table S1). As a large collaborative effort between researchers worldwide, the data were collected with a range of technologies with spatial resolutions from  $\leq 10$  s m for Global Positioning System (GPS) transmitters (88 individual tracks), to 100s m for ARGOS (advanced research and global observation satellite) linked transmitter (2160 individual tracks), and coarser for light-level geolocation tags (GLS; 168 individual tracks). Data were also provided raw or processed in different forms ranging from implementation of simple speed filters (1) to Kalman filters (2) and state-space models (3). For some species, tracking datasets were obtained using both ARGOS and GPS, so we were able to run preliminary tests to compare results on these species to ensure that our analysis of displacements was comparable and independent of the data resolution (detailed below). These sensitivity analyses were possible for Australian and Cape fur seals, California and Galapagos sea lions, Northern elephant seal, Laysan albatross and polar bear (Figure S4). Because a similar assessment was not possible for GLS data, we have not included in our analysis species for which only GLS data were available. For ARGOS data, we also compared results obtained across datasets with different levels of pre-processing (*e.g.*, raw or filtered data). For this comparison, we used raw ARGOS locations compared with the same datasets after processing with a state-space model for three species: Southern elephant seal, Australian sea lion, and Macaroni penguin (Figure S5). We also evaluated whether the results of the analysis would differ by using each type of data individually (Figure S6) and confirmed that the mixing of datasets did not impact on the results. After data checking and preliminary analysis, we were able to proceed with tracking data for 38 species (2248 individual tracks).

**Probabilistic analysis of displacements.** After calculating the displacements as the shortest great circle distance between two locations, we obtained the scaling properties of the displacements with time. The root-mean-square displacement ( $d_{\text{RMS}} = \sqrt{\langle d^2 \rangle}$ ) scaled as a power law of time in most cases,  $d_{\text{RMS}} \sim T^\mu$ . The exponent  $\mu$  is well-defined for Brownian and ballistic linear motion, taking values 0.5 and 1, respectively (4). We then compiled and compared the resulting distributions of the probability density functions (PDF) of the

displacements obtained from each individual when fixing the time window at 1 day ( $T = 1$ ). For comparison of the probability density functions (PDF) obtained from each individual when fixing the time window at 1 day, we considered the moments of the distributions, *i.e.*, the quantitative measures representing the shape of the resulting distributions. To that effect, we used the coefficient of PDF spread (CS) defined as the ratio between the second moment and the square of the first moment (*i.e.*, square of the mean):  $\frac{\langle d^2 \rangle}{\langle d \rangle^2}$ , where ‘d’ is the displacement in km. Our CS is related with the defined coefficient of variation (CV):  $CS = (CV)^2 + 1$ . The CS is a dimensionless measurement and can be used for comparison across all individuals irrespective of scale, providing an estimate of the spread of the resulting distribution normalized by the square of the average displacement. CS values  $\gg 1$  are therefore indicative of wide distributions with heavy tails decaying much more slowly than would be expected in a Gaussian distribution. Despite the conceptual differences between distributions with heavy tails, such as lognormal or power laws, this method served our need to compare patterns across different sized animals because the distributions generally indicate high probability for relatively small displacements, with very large displacements also likely to be observed but with low probability.

To partially account for potential differences associated with different life history stages, we did not mix stages for a selection of species (e.g., only lactating female California sea lions, males in non-breeding season for New Zealand fur seals). For other species for which we knowingly included more “stages” or “stage phases”, we ran preliminary tests showing that the coefficient of PDF spread (CS) and RMS exponents were mostly similar across all stages and trips considered (Table S5).

**Assessing coastal affinity.** We classified depths between 0 – 150 m according to the general bathymetric chart of the oceans (GEBCO; [gebco.net](http://gebco.net)). All other depths were considered off-shelf or open ocean habitat. When considering three groups, the coastal affinities of 0.3 and 0.7 were used for the split, and the species within each group were: (i) low coastal affinity: black footed albatross, blue shark, king penguin, Laysan albatross, leatherback turtle, northern elephant seal, northern fur seal, long-nosed fur seal, pilot whale, Southern right whale, southern elephant seal, and whale shark; (ii) mixed coastal affinity species: California sea lion, cape fur seal, crabeater seal, Galapagos sea lion, humpback whale, macaroni penguin, mako shark, New Zealand sea lion, polar bear, short-tailed shearwater, tiger shark, weddell seal, and western gull; and (iii) high coastal affinity species: Australian sea lions,

Australian fur seal, beluga, bottlenose dolphin, bull shark, dugong, flatback turtle, great hammerhead shark, green turtle, little penguin, loggerhead turtle, West Indian manatee and southern sea lion.

**Boosted regression trees.** We fitted BRT models (following 5) with a combination of learning rate (lr) and tree complexity (tc) of 0.003 and 10, respectively, which achieved minimum predictive error in preliminary cross validation procedures (*i.e.*, using random subsets of data for model training and the remainder as testing datasets for prediction). Models were developed using the *gbm* and *dismo* package in R (6) and adapting code previously published (5). The total number of trees (nt) was ~ 1500, and we used a bag fraction of 0.5 to select 50 % of the data randomly in each tree. We then used *gbm.simplify* (5) to see which variables could be excluded from the model and re-ran the BRT model with the simplified predictor set using the same combination of parameters (lr, tc, and bag fraction). We extracted the relative importance of variables using the *summary* function for the simplified model and then assessed the model fits using partial dependence plots (*i.e.*, the effect of a variable on the response after accounting for the average effects of all other variables in the model). To quantify interactions, we used the function *gbm.interactions* from the *dismo* package in R, which indicates the relative strength of interaction fitted by BRT (zero indicating that no interaction effects are fitted).

**Dendrogram of movement.** With the resulting matrix, we used the neighbour-joining method (7) to produce a dendrogram that includes all species. To assist interpretation of the observed branch patterns, we then contrasted the resulting tree with the predictors identified in the highest ranked models for CS by colour coding the dendrogram based on *coastal affinity*.

### *Supporting Acknowledgments*

We are thankful to all involved in data collection, including the Bardi Jawi Rangers (dugong data), as well as J Werry (shark tracking data from the QLD Large Shark Tagging Program). GCH thanks G Schofield, N Esteban, and J Houghton for invaluable help with fieldwork in the Mediterranean, Indian Ocean and Atlantic respectively and also Ernesto and Kirsty Bertarelli, and the Bertarelli Foundation, for their support of his research in the Chagos Archipelago and the BIOT Administration for assistance and permission to carry out research. M-AL thanks T Gelatt, the NRC Research Associateship Program and the NOAA, Alaska Fisheries Science Centre, Marine Mammal Lab. RHC thanks Sea to Shore Alliance. Elephant seal tracking datasets were collected as part of IMOS, a national collaborative research infrastructure, supported by the Australian Government and operated by a consortium of institutions as an unincorporated joint venture, with the University of Tasmania as Lead Agent, and MEOP-BR, funded by the Brazilian Science, Technology and Innovation Ministry (CNPq, Grant № 520196/2006-6). Other data were obtained by: Dauphin Island Sea Lab's Marine Mammal Research Program with funding from the Alabama Division of Wildlife and Freshwater Fisheries, Mobile Bay National Estuary Program, and Northern Gulf Institute (West Indian manatee); Office of Naval Research and Dolphin Quest Inc. (Bottlenose dolphin); NOAA's John H. Prescott Marine Mammal Rescue Assistance Grant Program (pilot whale); and U.S. Geological Survey with funds also provided by the USGS Ecosystems and Climate and Land Use Change Mission Areas (polar bear). Any use of trade, firm, or product names is for descriptive purposes only and does not imply endorsement by the U.S. Government. Blue and mako shark data was funded by the UK Natural Environment Research Council (NERC) Oceans 2025 Strategic Research Programme (D.W.S.), the Save Our Seas Foundation (D.W.S.), a Marine Biological Association Senior Research Fellowship (D.W.S.), European Regional Development Fund (FEDER) via the Programa Operacional Competitividade e Internacionalização (COMPETE), National Funds via Fundação para a Ciência e a Tecnologia (FCT) under PTDC/MAR/100345/2008 and COMPETE FCOMP-01-0124-FEDER-010580 (to N.Q. and D.W.S.) and FCT Investigator Fellowships IF/01611/2013 (to N.Q.).

## Supporting Figures

### Sup Figure 1: Allometric relationships for mean effective speed (km/day)

(A) and for the coefficient of PDF spread of the probability density functions (B) with body mass. Top left plot in each panel shows the relationship across all species, while each guild is presented in the other plots. Relationships and  $R^2$  shown only for guilds with more than 2 species.

A)

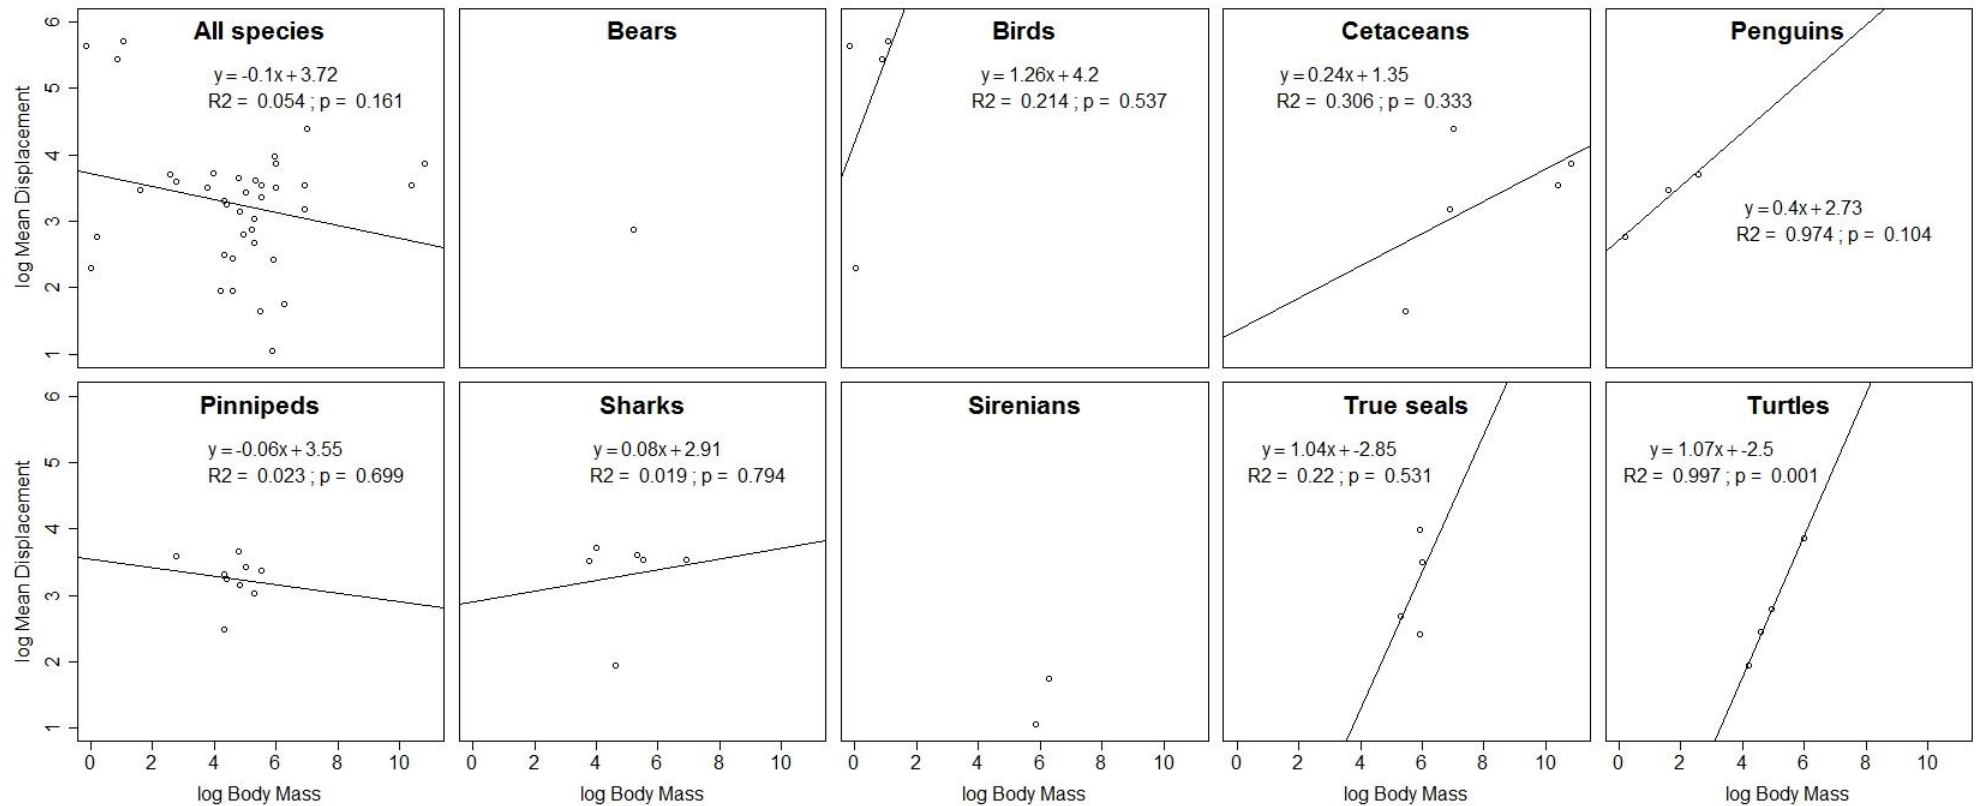

B)

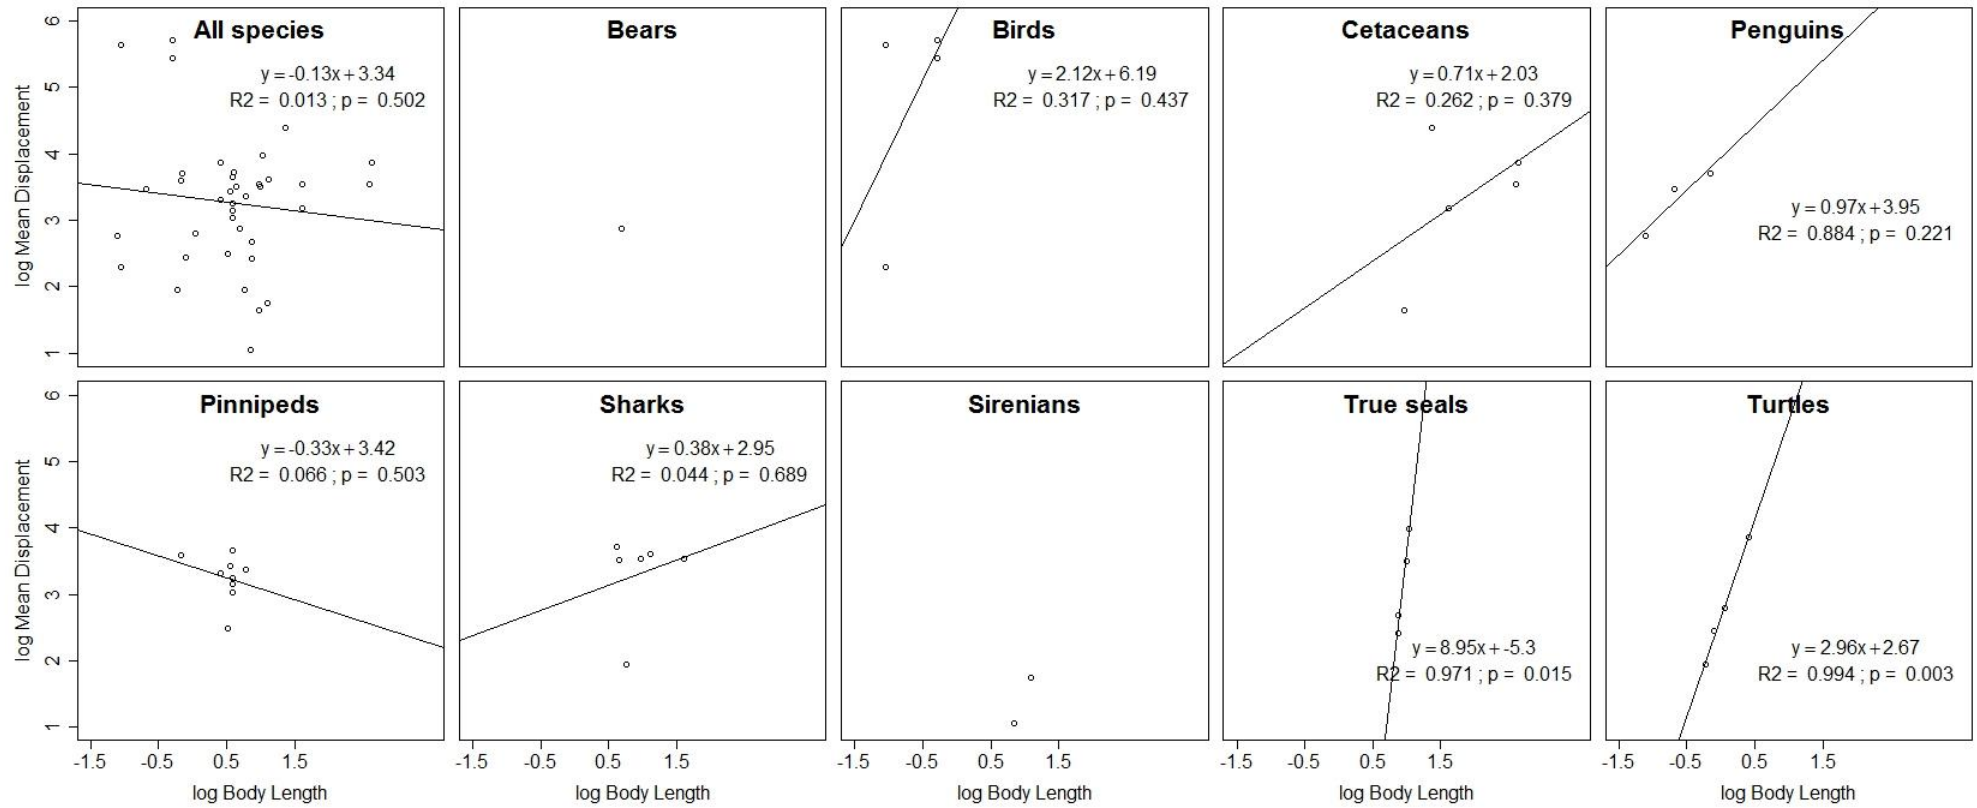

*Sup Figure 2: Interaction between coastal affinity and species*

Representation of the interaction between each species and coastal affinity as derived from the boosted regression trees. Red lines show the model predictions and black dots show data values for each individual tracking dataset analysed.

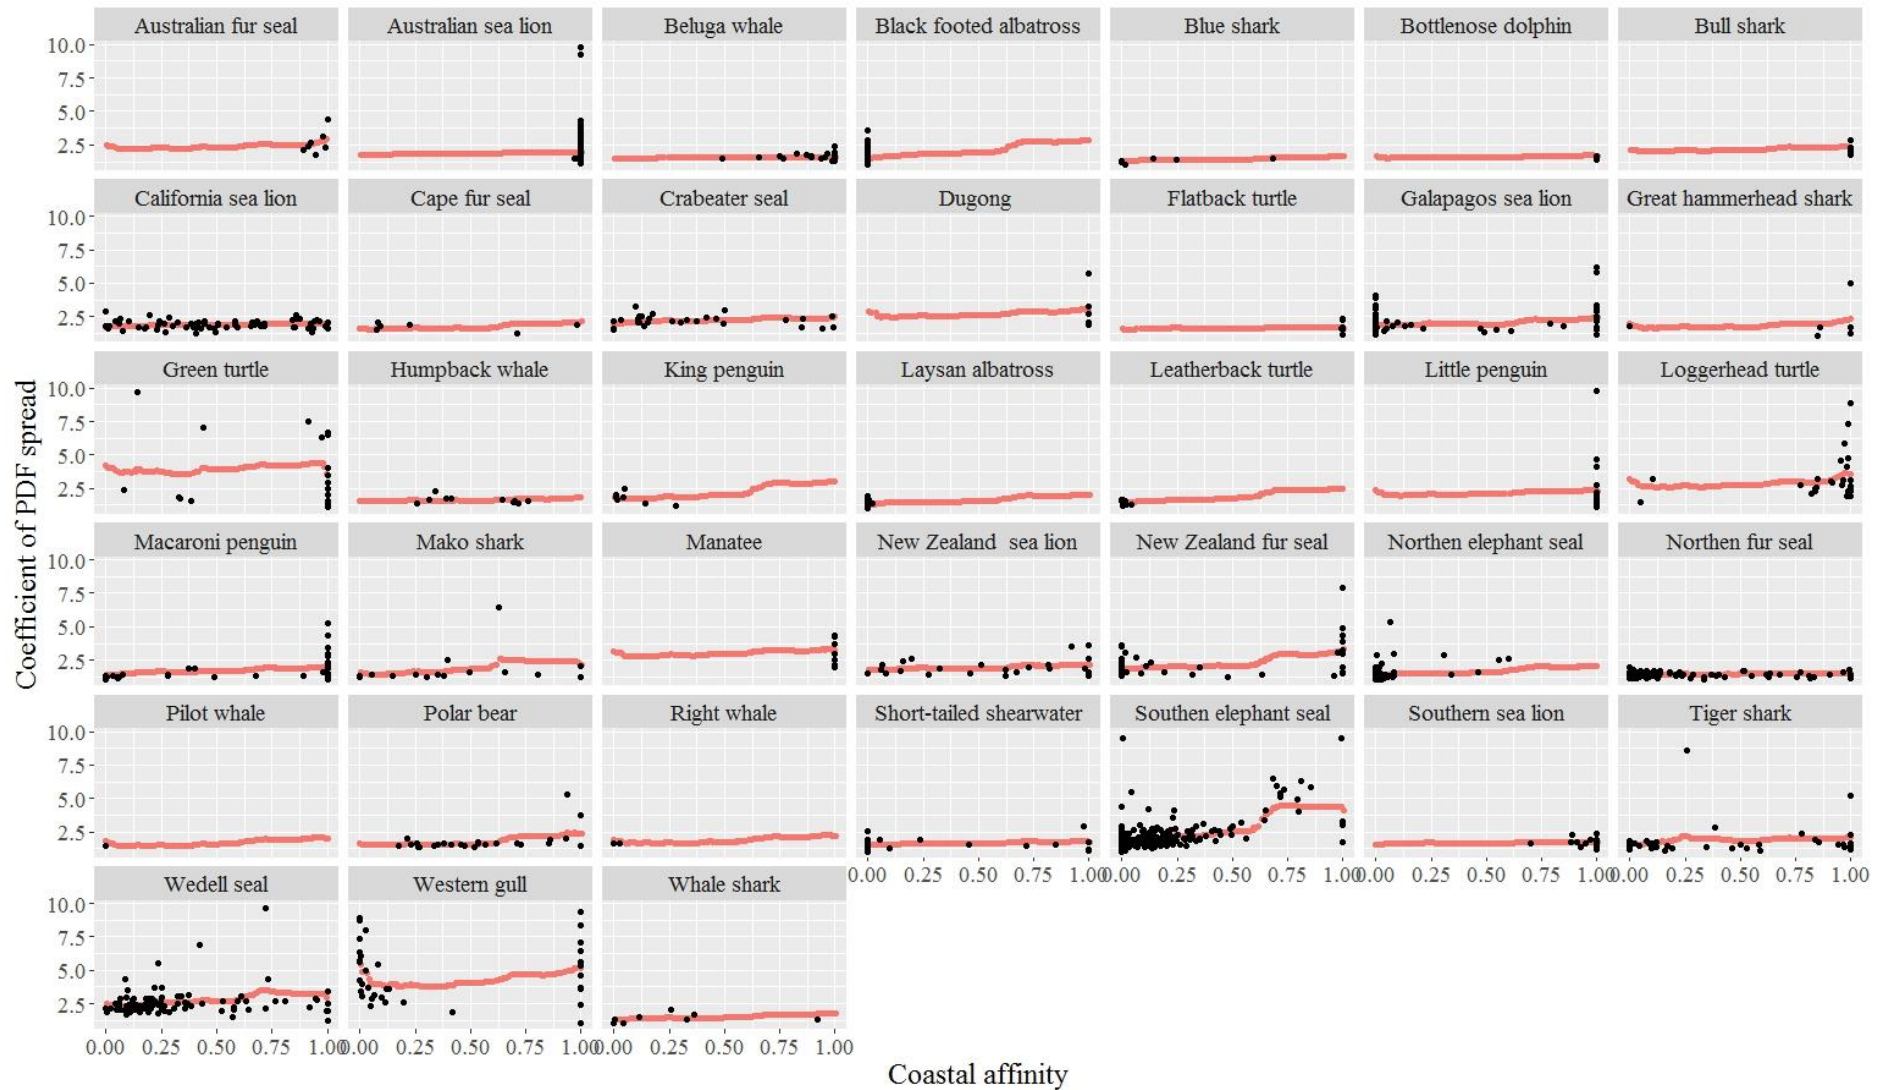



**Sup Figure 3: CS for species with mixed shelf affinity**

The plot shows the value for all displacements taking place in open (blue) and coastal (red) environments separately. Lines connecting the CS values are red (or blue) when coastal (or open) ocean CS values are higher, respectively.

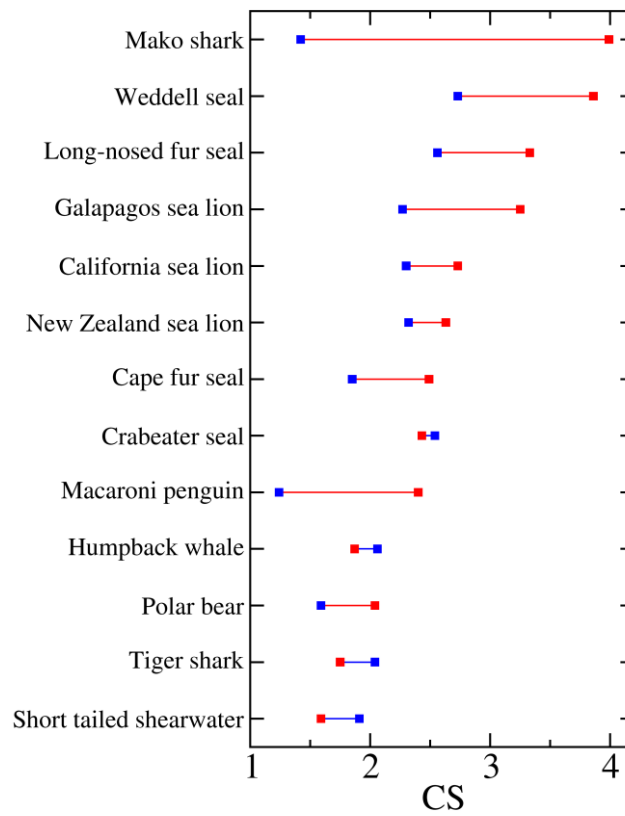

**Sup Figure 4: Comparison of results obtained from ARGOS (black) and GPS (red) positions.**

PDFs are shown for all species for which both types of data were available, including Australian and Cape fur seals, California and Galapagos sea lions, Laysan albatross, Northern elephant seals, and polar bears. Plots show high similarity in the PDFs of displacements obtained with GPS and ARGOS linked transmitters highlighting that, for the purpose used here, the results obtained from both technologies were comparable.

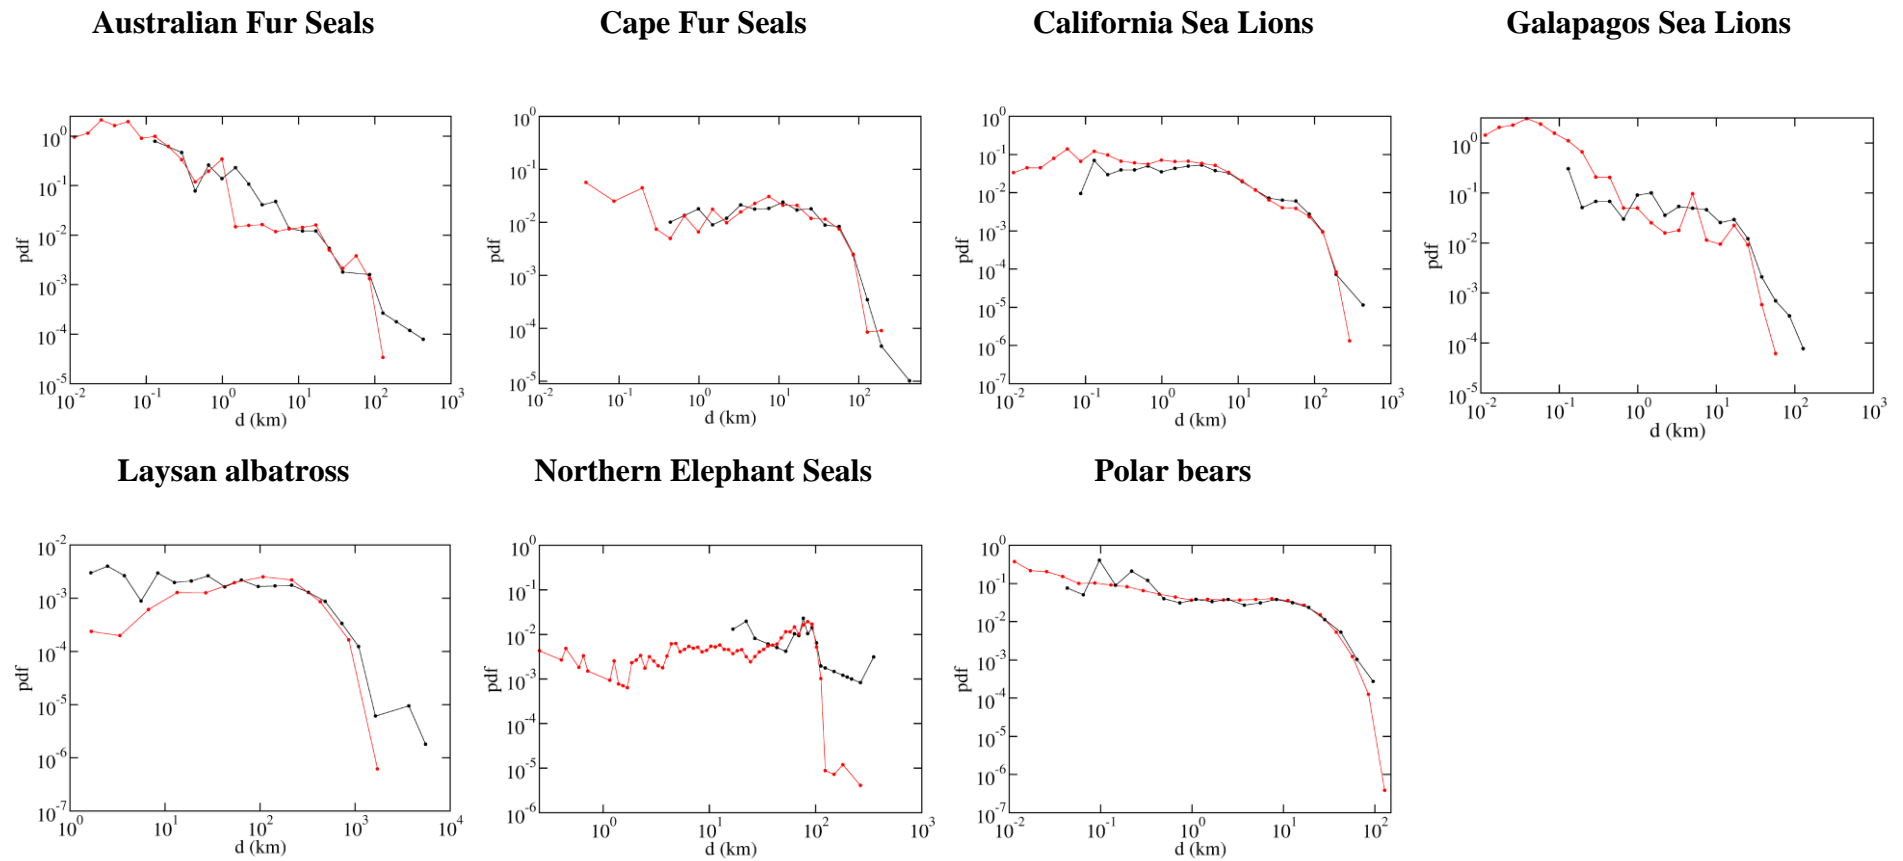

*Sup Figure 5: Comparison of results obtained from datasets with raw (black) and processed (red) data.*

Results are shown for species for which both raw and processed data were available: Australian sea lions, Southern elephant seals and Macaroni penguins. Plots show high similarity in the PDFs of displacements obtained when using raw or processed data highlighting that, for the purpose used here, the results obtained from both data types were comparable.

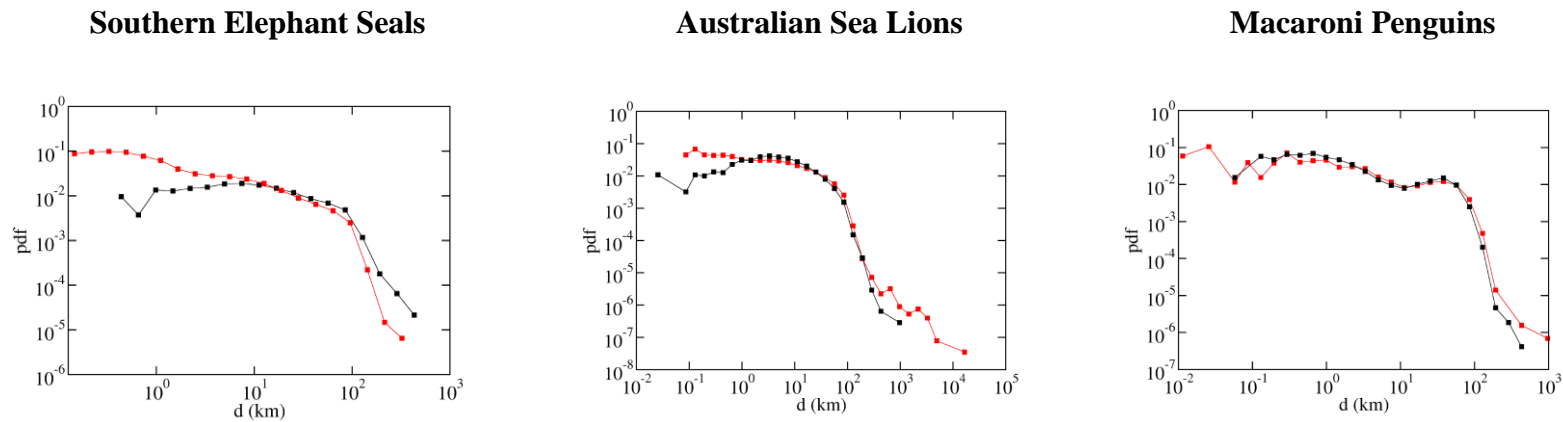

***Sup Figure 6: Replication of main results presented in the manuscript when using subsets of the global satellite tracking dataset.***

Replication of main outputs presented in Figure 2 (A), 3 (B) and 4 (C), after replicating all data analyses and modelling using only Argos (left column), raw (middle column) and processed (right column) datasets. Details presented in the captions of Figure 2, 3 and 4 also apply here to A, B and C respectively. Results obtained were similar across all tests performed, except for the angles distribution with processed data only:

- A) Highlights an expected increase in the coefficient of PDF spread (CS) with increased coastal affinity (CA), as detailed in the inset plot. The results from the boosted regression trees showed that species group and coastal affinity always had the highest relative importance with values: 68.9 % and 27.4 %, respectively with a small interaction size of 9 for Argos datasets only, 68.6 % and 23.9 %, respectively with interaction size of 22.67 for raw datasets only, and 74.0 % and 21.5 %, respectively with interaction size of 36.04 for processed datasets only.
- B) The distribution of angles for displacements taking place in coastal and open oceans (red and blue respectively) all show higher probability of directed movement with angles of  $0^\circ$  in open ocean and higher probability of ‘returns’ (angles  $> 45^\circ$  often peaking at  $180^\circ$ ) in the coastal ocean. This is also the case for processed datasets which contained no individuals with high CS values, and where the peak at  $180^\circ$  did not occur, but the lines (red and blue) cross at  $\sim 30^\circ$  and  $330^\circ$ , still showing a higher probability of  $30^\circ \leq \text{angles} \leq 330^\circ$  for coastal displacements.
- C) The dendrograms obtained with each subset of the global satellite tracking dataset all show a split between an upper and lower branch generally consistent with species having lower and higher coastal affinities, respectively.

Using only Argos datasets

Using only Raw datasets

Using only Processed datasets

A) Replicated Figure 2

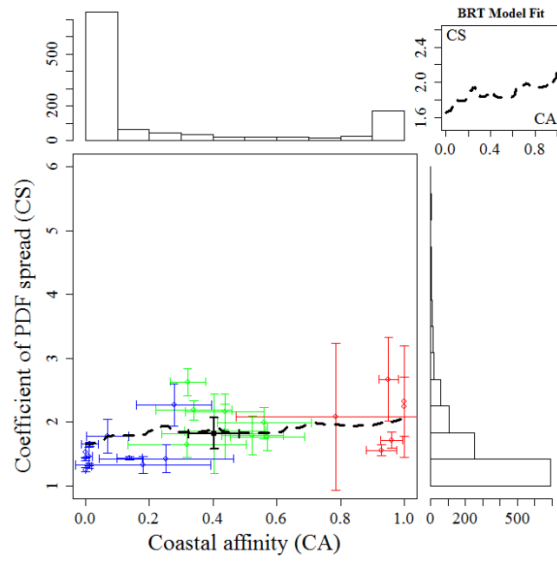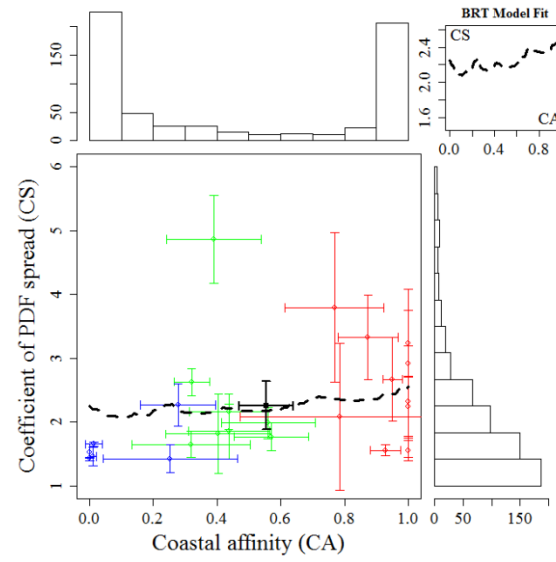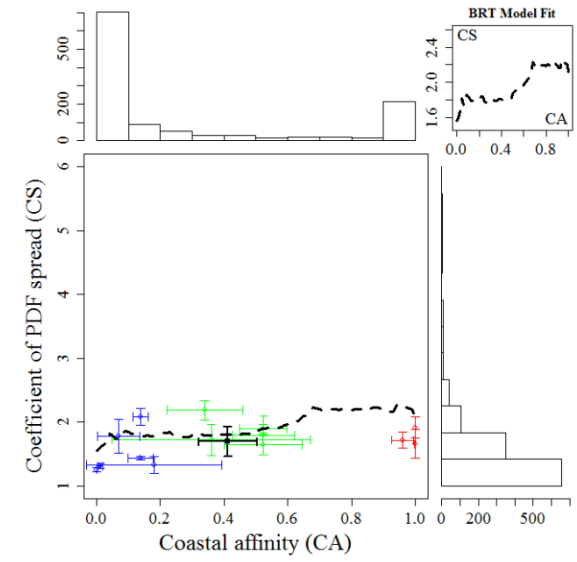

B) Replicated Figure 3

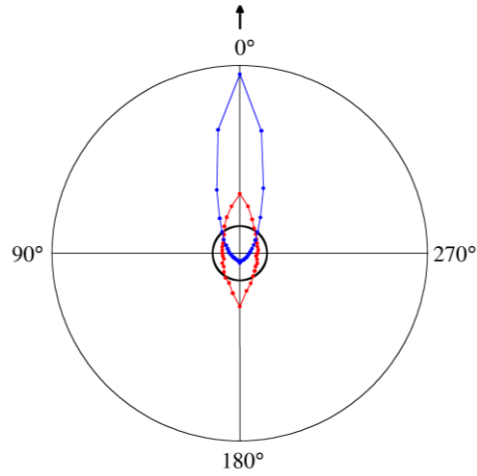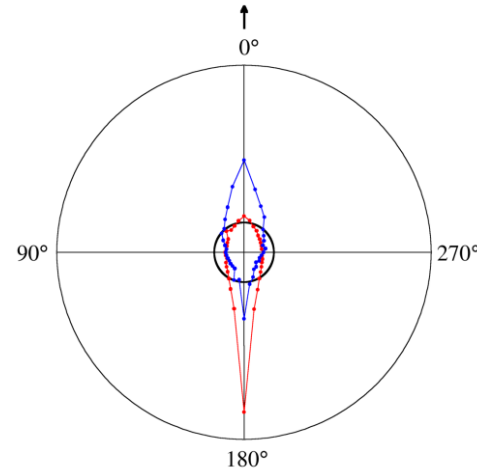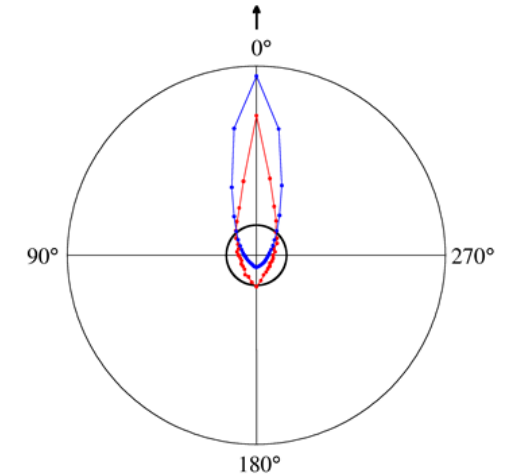

C) Replicated Figure 4

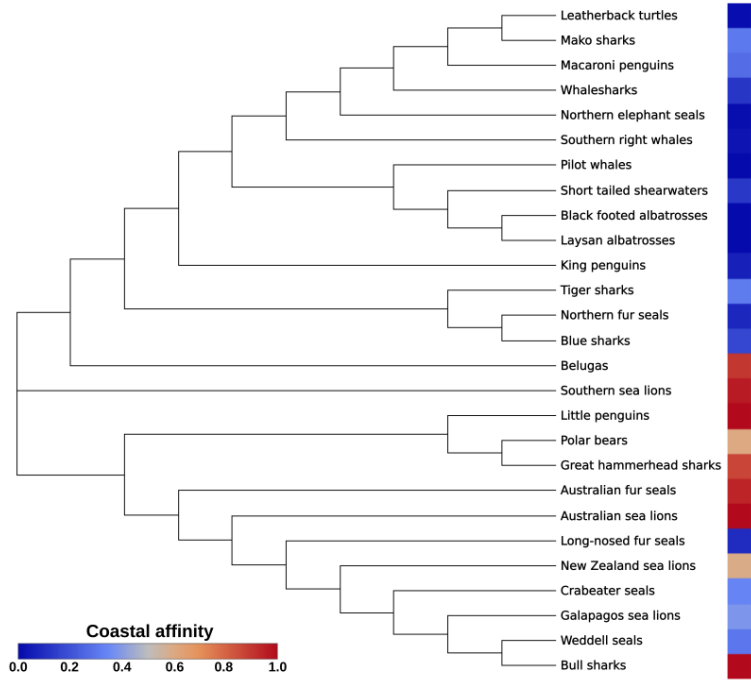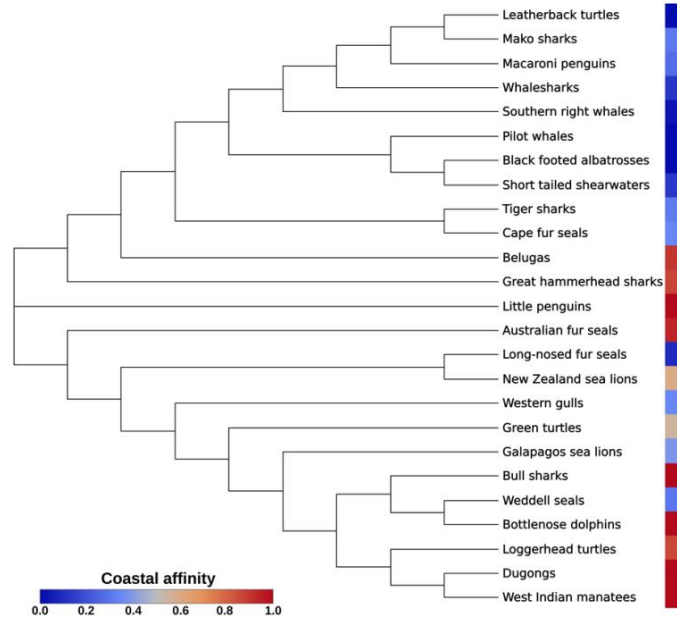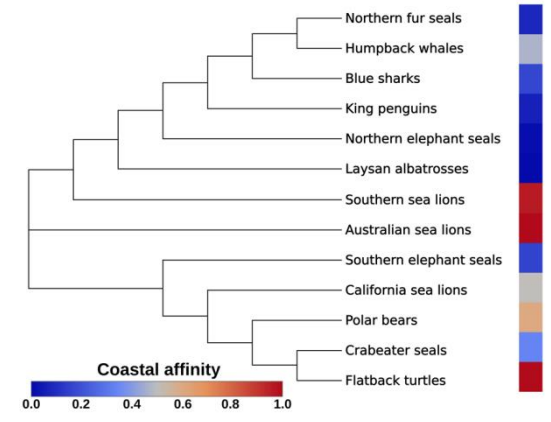

## *Supporting Tables*

### *Sup Table 1: Summary of species-specific datasets representing nine taxonomic groups including bears, flying and swimming birds, cetaceans, pinnipeds (true and eared seals), sharks, sirenians and turtles.*

Male and female adult (A) individuals were tracked and used for most species; where this was not the case, it is indicated with the following superscripts in front of the species common name: F – females only, Fl – fledglings only, &Fl – fledglings also, &J – juveniles also, M – males only, P – pups only, SA – sub-adults only, &SA – sub-adults also, U – unknown. ‘n’ indicates the number of compiled tracks per species. Tracks were obtained across various life stages for each species. The corresponding life history phase is indicated with superscripts following the number of tracks (# tracks): All – all phases represented, B – breeding, CR – chick rearing, F – foraging; G – guard stage, Inc – incubation, Lac – lactation, M – migration, NA – not applicable, NB – non-breeding adults, PB – post-breeding, PC – post-calving, PF – post-fledgling, PM – post-moulting, PW – post-weaning; S – released from stranding, U – unknown. “Events” – number of positions obtained within all tracks for each species. ‘Data’ indicates whether the data were raw (R) or processed (P) with superscripts indicating the position data type. The five quantitative variables considered in the models are also displayed: mean body mass (Mass), length (Length), and mean diving depth (Dive) provided by experts, food energy requirements (Energy) derived from published literature (as detailed in Table S2), and ‘coastal affinity’ (Coast) calculated from the data for each individual as a fraction of observed displacements on the coast, and shown here as percentage for each species. As most individuals tracked were not weighed and measured, an average weight and size for each species was used. For species for which the tracked data included different genders or age classes, the mean across the groups was used. Similarly, mean diving depths for each species were used. GPS: global positioning system, ARGOS: advanced research and global observation satellite, GLS: global location sensor. Greyed rows indicate species not included in the analysis (GLS data or not enough positions to perform analysis).

| Common name                             | Scientific name                   | # tracks            | Events | # used | Data               | Mass (Kg) | Length (m) | Dive (m) | Energy (kJ kg <sup>-1</sup> day <sup>-1</sup> ) | Coast (mean %) |
|-----------------------------------------|-----------------------------------|---------------------|--------|--------|--------------------|-----------|------------|----------|-------------------------------------------------|----------------|
| <b>Bears</b>                            |                                   |                     |        |        |                    |           |            |          |                                                 |                |
| Polar bear <sup>F</sup>                 | <i>Ursus maritimus</i>            | 62 <sup>Lac</sup>   | 102499 | 62     | P <sup>Argos</sup> | 182       | 2          | 0        | 294.9                                           | 0.523          |
| <b>Birds - Flying</b>                   |                                   |                     |        |        |                    |           |            |          |                                                 |                |
| Black footed albatross <sup>A, FI</sup> | <i>Phoebastria nigripes</i>       | 193 <sup>All</sup>  | 11741  | 72     | R <sup>Argos</sup> | 2.9       | 0.75       | 0        | 623.6                                           | 0.000          |
| Crested tern                            | <i>Thalasseus bergii</i>          | 22 <sup>CR</sup>    | 11728  | -      | R <sup>GPS</sup>   | -         | -          | -        | -                                               | -              |
| Flesh-footed shearwater                 | <i>Ardenna carneipes</i>          | 3 <sup>NA</sup>     | 643    | -      | -                  | -         | -          | -        | -                                               | -              |
| Laysan albatross <sup>FI</sup>          | <i>Phoebastria immutabilis</i>    | 122 <sup>All</sup>  | 13545  | 122    | P <sup>Argos</sup> | 2.4       | 0.75       | 0        | 662.4                                           | 0.000          |
| Short tailed shearwater                 | <i>Ardenna tenuirostris</i>       | 48 <sup>CR</sup>    | 12649  | 47     | R <sup>Argos</sup> | 0.63      | 0.45       | 11       | 2036.4                                          | 0.319          |
| Sooty shearwater                        | <i>Ardenna griseus</i>            | 27 <sup>NA</sup>    | 6977   | -      | -                  | -         | -          | -        | -                                               | -              |
| Western gull                            | <i>Larus occidentalis</i>         | 41 <sup>Inc</sup>   | 221209 | 41     | R <sup>GPS</sup>   | 1.02      | 0.35       | 0        | 1433.4                                          | 0.396          |
| <b>Birds - Swimming</b>                 |                                   |                     |        |        |                    |           |            |          |                                                 |                |
| Emperor penguin <sup>J</sup>            | <i>Aptenodytes forsteri</i>       | 56 <sup>PF</sup>    | 31922  | -      | R <sup>Argos</sup> | -         | -          | -        | -                                               | -              |
| King penguin                            | <i>Aptenodytes patagonicus</i>    | 8 <sup>CR</sup>     | 13125  | 8      | P <sup>Argos</sup> | 13        | 0.85       | 55       | 543.9                                           | 0.069          |
| Little penguin                          | <i>Eudyptula minor</i>            | 102 <sup>CR</sup>   | 5009   | 102    | R <sup>Argos</sup> | 1.2       | 0.33       | 12.7     | 1149.3                                          | 1.000          |
| Macaroni penguin                        | <i>Eudyptes chrysolophus</i>      | 91 <sup>G, NB</sup> | 18318  | 91     | R <sup>Argos</sup> | 5         | 0.5        | 42       | 734.2                                           | 0.571          |
| <b>Cetaceans</b>                        |                                   |                     |        |        |                    |           |            |          |                                                 |                |
| Beluga                                  | <i>Delphinapterus leucas</i>      | 31 <sup>NA</sup>    | 37089  | 31     | R <sup>Argos</sup> | 1000      | 5          | 450      | 249.6                                           | 0.928          |
| Bottlenose dolphin                      | <i>Tursiops truncatus</i>         | 3 <sup>All</sup>    | 1681   | 3      | R <sup>Argos</sup> | 238       | 2.64       | 2        | 272.1                                           | 1.000          |
| Franciscana/ La plata dolphin           | <i>Pontoporia blainvillei</i>     | 4 <sup>All</sup>    | 804    | -      | -                  | -         | -          | -        | -                                               | -              |
| Humpback whale <sup>U</sup>             | <i>Megaptera novaeangliae</i>     | 15 <sup>NA</sup>    | 707    | 12     | P <sup>Argos</sup> | 32800     | 13.5       | 146      | 61.1                                            | 0.523          |
| Pilot whale <sup>M</sup>                | <i>Globicephala macrorhynchus</i> | 2 <sup>S</sup>      | 510    | 2      | R <sup>Argos</sup> | 1100      | 3.92       | 50       | 129.8                                           | 0.000          |
| Risso's dolphin                         | <i>Grampus griseus</i>            | 1 <sup>NA</sup>     | 76     | -      | -                  | -         | -          | -        | -                                               | -              |
| Rough-toothed dolphin <sup>M</sup>      | <i>Steno bredanensis</i>          | 4 <sup>NA</sup>     | 528    | -      | -                  | -         | -          | -        | -                                               | -              |
| Southern right whale <sup>F</sup>       | <i>Eubalaena australis</i>        | 3 <sup>PC</sup>     | 1130   | 3      | R <sup>Argos</sup> | 50000     | 14         | 121      | 12.8                                            | 0.013          |
| <b>Pinnipeds – True seals</b>           |                                   |                     |        |        |                    |           |            |          |                                                 |                |



|                                              |                                             |                       |             |     |                            |       |      |      |       |       |
|----------------------------------------------|---------------------------------------------|-----------------------|-------------|-----|----------------------------|-------|------|------|-------|-------|
| Crabeater seal                               | <i>Lobodon carcinophaga</i>                 | 30 <sup>NA</sup>      | 12614       | 30  | P <sup>Argos</sup>         | 200   | 2.4  | 61   | 53.2  | 0.340 |
| Northern Elephant <sup>F</sup>               | <i>Mirounga angustirostris</i>              | 321 <sup>PM, PB</sup> | 102783<br>9 | 321 | P <sup>Argos</sup>         | 380   | 2.8  | 516  | 198.9 | 0.012 |
| Southern Elephant                            | <i>Mirounga leonina</i>                     | 273 <sup>PM</sup>     | 554003      | 272 | P <sup>Argos</sup>         | 402   | 2.7  | 450  | 219.9 | 0.138 |
| Weddell seal <sup>F</sup>                    | <i>Leptonychotes weddellii</i>              | 96 <sup>PM</sup>      | 62873       | 96  | R <sup>Argos</sup>         | 372   | 2.4  | 300  | 45.8  | 0.320 |
| <b>Pinnipeds – Eared seals</b>               |                                             |                       |             |     |                            |       |      |      |       |       |
| Antarctic fur seal <sup>F</sup>              | <i>Arctocephalus gazella</i>                | 132 <sup>PB</sup>     | 61264       | -   | -                          | -     | -    | -    | -     | -     |
| Australian fur seal <sup>M</sup>             | <i>Arctocephalus pusillus<br/>doriferus</i> | 8 <sup>PM</sup>       | 1342        | 8   | R <sup>Argos</sup>         | 200   | 1.8  | 69.3 | 98.9  | 0.953 |
| Australian sea lion <sup>A, SA</sup>         | <i>Neophoca cinerea</i>                     | 236 <sup>All</sup>    | 85507       | 236 | P <sup>Argos</sup>         | 81    | 1.8  | 50   | 640.1 | 1.000 |
| California sea lion <sup>F</sup>             | <i>Zalophus californianus</i>               | 75 <sup>Lac</sup>     | 52333       | 75  | P <sup>Argos&amp;GPS</sup> | 84    | 1.6  | 80   | 183.6 | 0.522 |
| Cape fur seal                                | <i>Arctocephalus pusillus</i>               | 6 <sup>NA</sup>       | 1066        | 6   | Argos&GPS                  | 120   | 1.8  | 70   | 500   | 0.360 |
| Galapagos sea lion <sup>F</sup>              | <i>Zalophus wollebaeki</i>                  | 64 <sup>B, PB</sup>   | 14896       | 64  | R <sup>Argos</sup>         | 74    | 1.67 | 95   | 352.5 | 0.436 |
| Long-nosed fur seal <sup>AF, SAM, J, M</sup> | <i>Arctocephalus forsteri</i>               | 102 <sup>B</sup>      | 23502       | 102 | R <sup>Argos</sup>         | 106   | 1.7  | 52.1 | 126.4 | 0.320 |
| New Zealand sea lion <sup>AF, SAM, J</sup>   | <i>Phocarctos hookeri</i>                   | 26 <sup>NA</sup>      | 25256       | 26  | R <sup>Argos</sup>         | 124.4 | 1.8  | 92.5 | 367.5 | 0.560 |
| Northern fur seal <sup>P</sup>               | <i>Callorhinus ursinus</i>                  | 158 <sup>PW</sup>     | 80863       | 158 | P <sup>Argos</sup>         | 15.6  | 0.84 | 13   | 527.8 | 0.139 |
| Southern sea lion <sup>F</sup>               | <i>Otaria flavescens</i>                    | 20 <sup>B</sup>       | 17448       | 20  | P <sup>Argos</sup>         | 150   | 1.75 | 64   | 106.3 | 0.959 |
| <b>Sharks (Elasmobranchs)</b>                |                                             |                       |             |     |                            |       |      |      |       |       |
| Blacktip shark                               | <i>Carcharhinus limbatus</i>                | 1 <sup>NA</sup>       | 167         | -   | -                          | -     | -    | -    | -     | -     |
| Blue shark <sup>J</sup>                      | <i>Prionace glauca</i>                      | 6 <sup>NA</sup>       | 1755        | 6   | P <sup>Argos</sup>         | 43.5  | 1.91 | 350  | 171.7 | 0.181 |
| Bull shark <sup>A, SA</sup>                  | <i>Carcharhinus leucas</i>                  | 34 <sup>NA</sup>      | 1301        | 26  | R <sup>Argos</sup>         | 100   | 2.14 | 30   | 23.9  | 1.000 |
| Great hammerhead shark <sup>A, SA</sup>      | <i>Sphyrna mokarran</i>                     | 34 <sup>NA</sup>      | 1059        | 20  | R <sup>Argos</sup>         | 250   | 2.64 | 150  | 96    | 0.785 |
| Mako shark <sup>SA</sup>                     | <i>Isurus oxyrinchus</i>                    | 16 <sup>NA</sup>      | 16153       | 16  | R <sup>Argos</sup>         | 54    | 1.84 | 80   | 171.7 | 0.404 |
| Manta ray                                    | <i>Manta alfredii</i>                       | 2 <sup>NA</sup>       | 151         | -   | -                          | -     | -    | -    | -     | -     |
| Scalloped hammerhead shark                   | <i>Sphyrna lewini</i>                       | 5 <sup>NA</sup>       | 151         | -   | -                          | -     | -    | -    | -     | -     |
| Silky shark                                  | <i>Carcharhinus falciformis</i>             | 1 <sup>NA</sup>       | 7           | -   | -                          | -     | -    | -    | -     | -     |
| Tiger shark <sup>SA</sup>                    | <i>Galeocerdo cuvier</i>                    | 75 <sup>NA</sup>      | 10430       | 70  | R <sup>Argos</sup>         | 207   | 3.05 | 150  | 30.6  | 0.438 |

|                                 |                             |                   |        |    |                            |      |      |     |       |       |
|---------------------------------|-----------------------------|-------------------|--------|----|----------------------------|------|------|-----|-------|-------|
| Whale shark <sup>SA</sup>       | <i>Rhincodon typus</i>      | 26 <sup>NA</sup>  | 3350   | 16 | R <sup>Argos</sup>         | 1000 | 5    | 110 | 21.5  | 0.253 |
| <b>Sirenians</b>                |                             |                   |        |    |                            |      |      |     |       |       |
| Dugong                          | <i>Dugong dugon</i>         | 6 <sup>NA</sup>   | 3728   | 6  | R <sup>GPS</sup>           | 350  | 2.34 | 5.5 | 94.2  | 1.000 |
| West Indian manatee             | <i>Trichechus manatus</i>   | 10 <sup>All</sup> | 121668 | 10 | R <sup>GPS</sup>           | 530  | 3    | 2   | 52.3  | 1.000 |
| <b>Turtles</b>                  |                             |                   |        |    |                            |      |      |     |       |       |
| Flatback turtle <sup>F</sup>    | <i>Natator depressus</i>    | 11 <sup>All</sup> | 12205  | 11 | P <sup>Argos&amp;GPS</sup> | 100  | 0.9  | 30  | 34.1  | 0.999 |
| Green turtle <sup>F</sup>       | <i>Chelonia mydas</i>       | 19 <sup>All</sup> | 13901  | 19 | R <sup>GPS</sup>           | 140  | 1.05 | 10  | 100.5 | 0.721 |
| Leatherback turtle <sup>F</sup> | <i>Dermochelys coriacea</i> | 6 <sup>All</sup>  | 72805  | 32 | R <sup>Argos</sup>         | 400  | 1.5  | 100 | 257   | 0.012 |
| Loggerhead turtle               | <i>Caretta caretta</i>      | 32 <sup>All</sup> | 5863   | 6  | R <sup>GPS</sup>           | 68   | 0.8  | 10  | 34.1  | 0.873 |

**Sup Table 2: Food energy requirements**

A mean value was used whenever a range was provided in the literature. For values provided in  $\text{kJ day}^{-1}$  with individual body mass not specified in reference, we assumed a mean weight (included in Table S1) to calculate food energy requirements per kg. Unless otherwise indicated, units below are in  $\text{kJ kg}^{-1} \text{ day}^{-1}$ . Conversion between calories and joules was made using kilocal = 4.1868 kjoule.

\*[www.env.gov.bc.ca/wat/wq/reference/foodandwater.html](http://www.env.gov.bc.ca/wat/wq/reference/foodandwater.html)

| Common name                   | Scientific name                   | Food energy requirements                                     | Reference |
|-------------------------------|-----------------------------------|--------------------------------------------------------------|-----------|
| <b>Bears</b>                  |                                   |                                                              |           |
| Polar bear                    | <i>Ursus maritimus</i>            | 51600 $\text{kJ day}^{-1}$ for a 175 kg bear                 | (8)       |
| <b>Birds - Flying</b>         |                                   |                                                              |           |
| Black footed albatross        | <i>Phoebastria nigripes</i>       | $7.933 \times M^{0.681}$                                     | (9)       |
| Laysan albatross              | <i>Phoebastria immutabilis</i>    | $7.933 \times M^{0.681}$                                     |           |
| Short tailed shearwater       | <i>Ardenna tenuirostris</i>       | $9.262 \times M^{0.765}$                                     |           |
| Western gull                  | <i>Larus occidentalis</i>         | $10.181 \times M^{0.717}$                                    |           |
| <b>Birds - Swimming</b>       |                                   |                                                              |           |
| King penguin                  | <i>Aptenodytes patagonicus</i>    | $10.649 \times M^{0.686}$ (for all penguins)                 | (9)       |
| Little penguin                | <i>Eudyptula minor</i>            |                                                              |           |
| Macaroni penguin              | <i>Eudyptes chrysolophus</i>      |                                                              |           |
| <b>Cetaceans</b>              |                                   |                                                              |           |
| Beluga                        | <i>Delphinapterus leucas</i>      | $47.7 \times 10^3 \text{ kcal day}^{-1} / 800 \text{ kg}$    | (10)      |
| Bottlenose dolphin            | <i>Tursiops truncatus</i>         | 45 – 65 and 60 – 90 $\text{kcal kg}^{-1} \text{ day}^{-1}$   | **        |
| Humpback whale                | <i>Megaptera novaeangliae</i>     | $437.7 \times 10^3 \text{ kcal day}^{-1} / 30000 \text{ kg}$ | (10)      |
| Pilot whale                   | <i>Globicephala macrorhynchus</i> | 31000 $\text{kcal day}^{-1} / 1000 \text{ kg whale}$         | (11)      |
| Southern right whale          | <i>Eubalaena australis</i>        | $192 \times M^{0.75}$                                        | (10)      |
| <b>Pinnipeds – True seals</b> |                                   |                                                              |           |
| Crabeater seal                | <i>Lobodon carcinophaga</i>       | $200 \times M^{0.75}$                                        | (10)      |
| Northern Elephant             | <i>Mirounga angustirostris</i>    | 35-60 $\text{kcal kg}^{-1} \text{ day}^{-1}$                 | *         |
| Southern Elephant             | <i>Mirounga leonina</i>           | 32100 $\text{MJ year}^{-1}$ immature animal in captivity     | (12)      |

|                                       |                                         |                                                                                                                          |            |
|---------------------------------------|-----------------------------------------|--------------------------------------------------------------------------------------------------------------------------|------------|
| Weddell seal                          | <i>Leptonychotes weddellii</i>          | $200 \times M^{0.75}$                                                                                                    | (10)       |
| <b><i>Pinnipeds – Eared seals</i></b> |                                         |                                                                                                                          |            |
| Australian fur seal                   | <i>Arctocephalus pusillus doriferus</i> | $372 \times M^{0.75}$                                                                                                    | (13)       |
| Australian sea lion                   | <i>Neophoca cinerea</i>                 | 35.6 and 68.1 MJ day <sup>-1</sup> (females and males)                                                                   | (13, 14)   |
| California sea lion                   | <i>Zalophus californianus</i>           | 12500±1900 – 21000±2200 MJ year <sup>-1</sup>                                                                            | (15)       |
| Cape fur seal                         | <i>Arctocephalus pusillus</i>           | 463.4 – 536.7 (for lactating females)                                                                                    | (16)       |
| Galapagos sea lion                    | <i>Zalophus wollebaeki</i>              | 352.5 (for lactating females)                                                                                            | (17)       |
| Long-nosed fur seal                   | <i>Arctocephalus forsteri</i>           | $372 \times M^{0.75}$                                                                                                    | (13, 14)   |
| New Zealand sea lion                  | <i>Phocarctos hookeri</i>               | 4 – 11 and 5 – 11 % of 377-43 and 115-44 kg (male and female) day <sup>-1</sup> with food energy at 7 kJ g <sup>-1</sup> | (18)       |
| Northern fur seal                     | <i>Callorhinus ursinus</i>              | 527.8±65.7                                                                                                               | (19)       |
| Southern sea lion                     | <i>Otaria flavescens</i>                | $372 \times M^{0.75}$                                                                                                    | (10)       |
| <b>Sharks</b>                         |                                         |                                                                                                                          |            |
| Blue shark                            | <i>Prionace glauca</i>                  | 41 kcal kg <sup>-1</sup> day <sup>-1</sup>                                                                               | (20)       |
| Bull shark                            | <i>Carcharhinus leucas</i>              | 5.7 kcal kg <sup>-1</sup> day <sup>-1</sup>                                                                              | (20)       |
| Great hammerhead shark                | <i>Sphyrna mokarran</i>                 | 96 (value for scalloped hammerhead sharks)                                                                               | (21)       |
| Mako shark                            | <i>Isurus oxyrinchus</i>                | (1) 27.9 g kg <sup>-1</sup> d <sup>-1</sup> with 4.51 kJ g <sup>-1</sup> (2) 41 kcal kg <sup>-1</sup> day <sup>-1</sup>  | (1)<br>(2) |
| Tiger shark                           | <i>Galeocerdo cuvier</i>                | C/F/W * 100 = 0.561 % BW day <sup>-1</sup>                                                                               | (22)       |
| Whale shark                           | <i>Rhincodon typus</i>                  | 14931 and 28121 kJ day <sup>-1</sup> (for 4.34 and 6.22 m animal, respectively)                                          | (23)       |
| <b>Sirenians</b>                      |                                         |                                                                                                                          |            |
| Dugong                                | <i>Dugong dugon</i>                     | 1.8 x that of manatee                                                                                                    | (24)       |
| West Indian manatee                   | <i>Trichechus manatus</i>               | (1) 5 – 20 (2) 29000 kcal day <sup>-1</sup> /300 kg                                                                      | (**, 24)   |
| <b>Turtles</b>                        |                                         |                                                                                                                          |            |
| Flatback turtle                       | <i>Natator depressus</i>                | 19.4-48.8                                                                                                                | (25)       |
| Green turtle                          | <i>Chelonia mydas</i>                   | 202 kcal/kg/day but also 233 kcal day <sup>-1</sup> / 9.58 kg based on SMR = 32 W <sup>0.86</sup>                        | (26)       |
| Leatherback turtle                    | <i>Dermochelys coriacea</i>             | 145-369                                                                                                                  | (27)       |
| Loggerhead turtle                     | <i>Caretta caretta</i>                  | 19.4-48.8                                                                                                                | (25)       |

**Sup Table 3: List of qualitative biological traits per species and taxonomic families based on expert knowledge.**

Trip distance and time represent respective summaries of foraging trips and include five classes each. For distance: tens, hundreds, thousands or tens of thousands kilometres, or *in situ*, and for time: one day, several days, months, years, or *in situ*. *In situ* was used when there was not a defined start and end for the trip or when it is unknown. Four other qualitative traits were considered comprising breeding and foraging strategies and the distributional range of the species, including: ‘Breeding strategy’ classed as capital or income, ‘Central place forager’ classed as yes or no, ‘Foraging social behaviour’ classed as social or solitary, and species range (‘Range’) defined as temperate, tropical, polar or global.

| Common name             | Family          | Trip distance (km) | Trip time | Breeding strategy | Central place forager | Foraging social behaviour | Range     |
|-------------------------|-----------------|--------------------|-----------|-------------------|-----------------------|---------------------------|-----------|
| <b>Bears</b>            |                 |                    |           |                   |                       |                           |           |
| Polar bear              | Ursidae         | Thousands          | Months    | Income            | No                    | Solitary                  | Polar     |
| <b>Birds - Flying</b>   |                 |                    |           |                   |                       |                           |           |
| Black footed albatross  | Diomedidae      | Thousands          | Months    | Income            | Yes                   | Solitary                  | Temperate |
| Laysan albatross        | Diomedidae      | Thousands          | Days      | Income            | Yes                   | Solitary                  | Temperate |
| Shearwater              | Procellariidae  | Thousands          | Days      | Income            | Yes                   | Social                    | Global    |
| Short tailed shearwater | Procellariidae  | Thousands          | Days      | Income            | Yes                   | Social                    | Global    |
| Western gull            | Laridae         | Tens               | Day       | Income            | Yes                   | Social                    | Temperate |
| <b>Birds - Swimming</b> |                 |                    |           |                   |                       |                           |           |
| King penguin            | Spheniscidae    | Hundreds           | Days      | Income            | Yes                   | Solitary                  | Polar     |
| Little penguin          | Spheniscidae    | Tens               | Day       | Income            | Yes                   | Social                    | Temperate |
| Macaroni penguin        | Spheniscidae    | Tens               | Day       | Income            | Yes                   | Social                    | Polar     |
| <b>Cetaceans</b>        |                 |                    |           |                   |                       |                           |           |
| Beluga                  | Monodontidae    | Thousands          | Months    | Income            | No                    | Social                    | Polar     |
| Bottlenose dolphin      | Delphinidae     | Hundreds           | Years     | Income            | No                    | Social                    | Global    |
| Humpback whale          | Balaenopteridae | Thousands          | Months    | Capital           | No                    | Social                    | Global    |

|                                |                |                |                |         |     |          |           |
|--------------------------------|----------------|----------------|----------------|---------|-----|----------|-----------|
| Pilot whale                    | Delphinidae    | Thousands      | Months         | Income  | No  | Social   | Global    |
| Southern right whale           | Balaenidae     | Thousands      | Months         | Capital | No  | Solitary | Temperate |
| <b>Pinnipeds – True seals</b>  |                |                |                |         |     |          |           |
| Crabeater seal                 | Phocidae       | <i>In situ</i> | <i>In situ</i> | Capital | No  | Solitary | Polar     |
| Northern elephant seal         | Phocidae       | Thousands      | Months         | Capital | No  | Solitary | Temperate |
| Southern elephant seal         | Phocidae       | Tens thousands | Months         | Capital | No  | Solitary | Polar     |
| Weddell seal                   | Phocidae       | <i>In situ</i> | <i>In situ</i> | Capital | No  | Solitary | Polar     |
| <b>Pinnipeds – Eared seals</b> |                |                |                |         |     |          |           |
| Australian fur seal            | Otariidae      | Hundreds       | Days           | Income  | No  | Solitary | Temperate |
| Australian sea lion            | Otariidae      | Hundreds       | Days           | Income  | Yes | Solitary | Temperate |
| California sea lion            | Otariidae      | Hundreds       | Days           | Income  | Yes | Solitary | Temperate |
| Cape fur seal                  | Otariidae      | Hundreds       | Days           | Income  | Yes | Solitary | Temperate |
| Galapagos sea lion             | Otariidae      | Tens           | Days           | Income  | Yes | Solitary | Tropical  |
| Long-nosed fur seal            | Otariidae      | Hundreds       | Days           | Capital | Yes | Solitary | Temperate |
| New Zealand sea lion           | Otariidae      | Tens           | Days           | Income  | Yes | Solitary | Temperate |
| Northern fur seal              | Otariidae      | Thousands      | Years          | Income  | No  | Solitary | Temperate |
| Southern sea lion              | Otariidae      | Tens           | Days           | Income  | Yes | Solitary | Temperate |
| <b>Sharks</b>                  |                |                |                |         |     |          |           |
| Blue shark                     | Carcharhinidae | Thousands      | Months         | Income  | No  | Solitary | Global    |
| Bull shark                     | Carcharhinidae | <i>In situ</i> | Months         | Income  | No  | Solitary | Global    |
| Great hammerhead shark         | Sphyrnidae     | <i>In situ</i> | Months         | Income  | No  | Solitary | Global    |
| Mako shark                     | Lamnidae       | Hundreds       | Years          | Income  | No  | Solitary | Temperate |
| Tiger shark                    | Carcharhinidae | <i>In situ</i> | <i>In situ</i> | Income  | No  | Solitary | Tropical  |
| Whale shark                    | Rhincodontidae | Thousands      | Months         | Income  | No  | Solitary | Tropical  |
| <b>Sirenians</b>               |                |                |                |         |     |          |           |
| Dugong                         | Dugongidae     | <i>In situ</i> | <i>In situ</i> | Income  | No  | Solitary | Tropical  |
| West Indian manatee            | Trichechidae   | Thousands      | Months         | Income  | No  | Solitary | Tropical  |
| <b>Turtles</b>                 |                |                |                |         |     |          |           |
| Flatback turtle                | Cheloniidae    | Thousands      | Years          | Capital | No  | Solitary | Tropical  |

|                    |             |                |        |         |    |          |          |
|--------------------|-------------|----------------|--------|---------|----|----------|----------|
| Green turtle       | Cheloniidae | Thousands      | Months | Capital | No | Solitary | Tropical |
| Leatherback turtle | Cheloniidae | Tens thousands | Years  | Capital | No | Solitary | Global   |
| Loggerhead turtle  | Cheloniidae | Thousands      | Months | Capital | No | Solitary | Tropical |

---

*Sup Table 4: Summary statistics for CS and coastal affinity obtained for all individuals in the dataset.*

Coastal affinity is defined as the proportion of individuals tracks occurring within depths  $\leq 150$  m. Rows highlighted in blue indicate species with low coastal affinity, and in red species with strong affinity to coastal environments. Rows were left white for species with no clear preference for coastal or open ocean habitats (mixed affinity). CS indicates the coefficient of PDF spread and Coastal affinity the proportion of observed displacements occurring within coastal habitats (considered to be within 0 and 150 m of depth). Mean values are highlighted in bold.

| Common name                          | CS   |      |        |              |       |       | Coastal affinity |       |        |              |       |       |
|--------------------------------------|------|------|--------|--------------|-------|-------|------------------|-------|--------|--------------|-------|-------|
|                                      | Min  | Q1   | Median | Mean         | Q3    | Max   | Min              | Q1    | Median | Mean         | Q3    | Max   |
| <b>Bears</b>                         |      |      |        |              |       |       |                  |       |        |              |       |       |
| Polar bear                           | 1.34 | 1.45 | 1.582  | <b>1.795</b> | 1.682 | 5.316 | 0.177            | 0.270 | 0.496  | <b>0.523</b> | 0.715 | 1.000 |
| <b>Birds - Flying</b>                |      |      |        |              |       |       |                  |       |        |              |       |       |
| Black footed albatross               | 1.02 | 1.17 | 1.302  | <b>1.525</b> | 1.698 | 3.583 | 0.000            | 0.000 | 0.000  | <b>0.000</b> | 0.000 | 0.000 |
| Laysan albatross                     | 1.02 | 1.11 | 1.198  | <b>1.254</b> | 1.347 | 1.908 | 0.000            | 0.000 | 0.000  | <b>0.000</b> | 0.000 | 0.021 |
| Shearwater                           | 1.01 | 1.36 | 1.563  | <b>1.649</b> | 1.883 | 2.908 | 0.000            | 0.000 | 0.027  | <b>0.319</b> | 0.747 | 1.000 |
| Western gull                         | 1.08 | 3.18 | 4.587  | <b>4.865</b> | 6.082 | 9.367 | 0.000            | 0.010 | 0.099  | <b>0.390</b> | 1.000 | 1.000 |
| <b>Birds - Swimming</b>              |      |      |        |              |       |       |                  |       |        |              |       |       |
| King penguin                         | 1.15 | 1.61 | 1.819  | <b>1.777</b> | 1.909 | 2.437 | 0.007            | 0.010 | 0.030  | <b>0.069</b> | 0.071 | 0.281 |
| Little penguin                       | 1.08 | 1.31 | 1.733  | <b>2.321</b> | 2.081 | 9.770 | 1.000            | 1.000 | 1.000  | <b>1.000</b> | 1.000 | 1.000 |
| Macaroni penguin                     | 1.05 | 1.15 | 1.380  | <b>1.769</b> | 2.022 | 5.221 | 0.000            | 0.022 | 0.893  | <b>0.571</b> | 1.000 | 1.000 |
| <b>Cetaceans</b>                     |      |      |        |              |       |       |                  |       |        |              |       |       |
| Beluga                               | 1.27 | 1.43 | 1.498  | <b>1.558</b> | 1.633 | 2.350 | 0.488            | 0.895 | 0.998  | <b>0.928</b> | 1.000 | 1.000 |
| Bottlenose dolphin                   | 1.39 | 1.50 | 1.612  | <b>1.552</b> | 1.633 | 1.654 | 1.000            | 1.000 | 1.000  | <b>1.000</b> | 1.000 | 1.000 |
| Humpback whale                       | 1.35 | 1.52 | 1.604  | <b>1.645</b> | 1.712 | 2.263 | 0.259            | 0.353 | 0.528  | <b>0.523</b> | 0.696 | 0.760 |
| Pilot whale                          | 1.43 | 1.43 | 1.438  | <b>1.438</b> | 1.439 | 1.440 | 0.000            | 0.000 | 0.000  | <b>0.000</b> | 0.000 | 0.000 |
| Southern right whale                 | 1.63 | 1.64 | 1.652  | <b>1.652</b> | 1.662 | 1.671 | 0.000            | 0.007 | 0.013  | <b>0.013</b> | 0.020 | 0.026 |
| <b><i>Pinnipeds – True seals</i></b> |      |      |        |              |       |       |                  |       |        |              |       |       |



|                                       |      |      |       |              |       |       |       |       |       |              |       |       |
|---------------------------------------|------|------|-------|--------------|-------|-------|-------|-------|-------|--------------|-------|-------|
| Crabeater seal                        | 1.50 | 1.95 | 2.197 | <b>2.185</b> | 2.382 | 3.289 | 0.000 | 0.111 | 0.175 | <b>0.340</b> | 0.496 | 0.994 |
| Northern elephant seal                | 1.02 | 1.13 | 1.257 | <b>1.310</b> | 1.384 | 5.334 | 0.000 | 0.000 | 0.000 | <b>0.012</b> | 0.005 | 0.602 |
| Southern elephant seal                | 1.02 | 1.53 | 1.827 | <b>2.082</b> | 2.169 | 9.548 | 0.000 | 0.000 | 0.069 | <b>0.138</b> | 0.183 | 1.000 |
| Weddell seal                          | 1.23 | 2.10 | 2.490 | <b>2.631</b> | 2.775 | 9.600 | 0.000 | 0.120 | 0.218 | <b>0.320</b> | 0.429 | 1.000 |
| <b><i>Pinnipeds – Eared seals</i></b> |      |      |       |              |       |       |       |       |       |              |       |       |
| Australian fur seal                   | 1.76 | 2.18 | 2.379 | <b>2.672</b> | 2.882 | 4.436 | 0.894 | 0.919 | 0.947 | <b>0.950</b> | 0.987 | 1.000 |
| Australian sea lion                   | 1.14 | 1.41 | 1.596 | <b>1.916</b> | 1.960 | 9.753 | 0.972 | 1.000 | 1.000 | <b>1.000</b> | 1.000 | 1.000 |
| California sea lion                   | 1.27 | 1.70 | 1.831 | <b>1.897</b> | 2.079 | 2.866 | 0.000 | 0.250 | 0.494 | <b>0.522</b> | 0.852 | 1.000 |
| Cape fur seal                         | 1.21 | 1.59 | 1.815 | <b>1.722</b> | 1.889 | 2.056 | 0.075 | 0.083 | 0.158 | <b>0.360</b> | 0.589 | 0.979 |
| Galapagos sea lion                    | 1.11 | 1.49 | 1.768 | <b>2.162</b> | 2.508 | 6.212 | 0.000 | 0.000 | 0.144 | <b>0.436</b> | 1.000 | 1.000 |
| Long-nosed fur seal                   | 1.23 | 1.56 | 1.910 | <b>2.268</b> | 2.651 | 7.897 | 0.000 | 0.000 | 0.000 | <b>0.278</b> | 0.516 | 1.000 |
| New Zealand sea lion                  | 1.33 | 1.57 | 1.840 | <b>1.986</b> | 2.157 | 3.578 | 0.000 | 0.187 | 0.623 | <b>0.560</b> | 0.935 | 1.000 |
| Northern fur seal                     | 1.08 | 1.32 | 1.437 | <b>1.435</b> | 1.541 | 2.020 | 0.000 | 0.005 | 0.025 | <b>0.139</b> | 0.123 | 1.000 |
| Southern sea lion                     | 1.19 | 1.60 | 1.694 | <b>1.718</b> | 1.825 | 2.363 | 0.700 | 0.937 | 1.000 | <b>0.959</b> | 1.000 | 1.000 |
| <b>Sharks</b>                         |      |      |       |              |       |       |       |       |       |              |       |       |
| Blue shark                            | 1.05 | 1.25 | 1.344 | <b>1.328</b> | 1.465 | 1.500 | 0.000 | 0.004 | 0.079 | <b>0.181</b> | 0.221 | 0.684 |
| Bull shark                            | 1.77 | 1.94 | 2.165 | <b>2.244</b> | 2.467 | 2.867 | 1.000 | 1.000 | 1.000 | <b>1.000</b> | 1.000 | 1.000 |
| Great hammerhead shark                | 1.06 | 1.36 | 1.692 | <b>2.083</b> | 1.806 | 4.953 | 0.000 | 0.853 | 0.931 | <b>0.785</b> | 1.000 | 1.000 |
| Mako shark                            | 1.21 | 1.29 | 1.445 | <b>1.813</b> | 1.595 | 6.414 | 0.000 | 0.124 | 0.365 | <b>0.404</b> | 0.636 | 1.000 |
| Tiger shark                           | 1.12 | 1.31 | 1.522 | <b>1.856</b> | 1.722 | 8.636 | 0.000 | 0.089 | 0.348 | <b>0.438</b> | 0.857 | 1.000 |
| Whale shark                           | 1.06 | 1.24 | 1.356 | <b>1.426</b> | 1.561 | 2.043 | 0.000 | 0.034 | 0.186 | <b>0.253</b> | 0.336 | 0.918 |
| <b>Sirenians</b>                      |      |      |       |              |       |       |       |       |       |              |       |       |
| Dugong                                | 1.85 | 1.97 | 2.403 | <b>2.917</b> | 3.094 | 5.687 | 1.000 | 1.000 | 1.000 | <b>1.000</b> | 1.000 | 1.000 |
| West Indian manatee                   | 2.00 | 2.61 | 3.340 | <b>3.233</b> | 3.704 | 4.375 | 1.000 | 1.000 | 1.000 | <b>1.000</b> | 1.000 | 1.000 |
| <b>Turtles</b>                        |      |      |       |              |       |       |       |       |       |              |       |       |
| Flatback turtle                       | 1.12 | 1.54 | 1.600 | <b>1.654</b> | 1.689 | 2.356 | 0.990 | 1.000 | 1.000 | <b>0.999</b> | 1.000 | 1.000 |
| Green turtle                          | 1.09 | 1.79 | 2.476 | <b>3.794</b> | 6.441 | 9.651 | 0.083 | 0.412 | 1.000 | <b>0.768</b> | 1.000 | 1.000 |
| Leatherback turtle                    | 1.20 | 1.29 | 1.547 | <b>1.459</b> | 1.607 | 1.661 | 0.000 | 0.001 | 0.006 | <b>0.012</b> | 0.017 | 0.040 |

|                   |      |      |       |              |       |       |       |       |       |              |       |       |
|-------------------|------|------|-------|--------------|-------|-------|-------|-------|-------|--------------|-------|-------|
| Loggerhead turtle | 1.45 | 2.33 | 2.732 | <b>3.330</b> | 3.236 | 8.838 | 0.050 | 0.843 | 0.968 | <b>0.873</b> | 0.996 | 1.000 |
|-------------------|------|------|-------|--------------|-------|-------|-------|-------|-------|--------------|-------|-------|

**Sup Table 5: Summary table with the coefficient of PDF spread (CS) and RMS exponents calculated when using stage- and trip-specific portions of the datasets for four species representative of three guilds.**

The table shows similar results for RMS exponent and CS values across all stages/trips considered, with only two exceptions. These were for the CS of shearwaters' short trips, however, short trips corresponded only to 15 % of the displacements for the species, and for the RMS of "inter-nesting" turtles, however, the joint value was representative of all the other stages for the species.

| <b>Species</b>          | <b>Stage</b>                               | <b>RMS</b> | <b>CS</b> |
|-------------------------|--------------------------------------------|------------|-----------|
| Northern elephant seal  | Post-breeding                              | 0.94       | 1.21      |
|                         | Post-moulting                              | 0.94       | 1.43      |
|                         | Together                                   | 0.95       | 1.37      |
| Macaroni penguin        | Non-breeding                               | 0.85       | 1.34      |
|                         | Guard                                      | 0.80       | 1.91      |
|                         | Together                                   | 0.85       | 1.77      |
| Short tailed shearwater | Short-trips while chick rearing (on shelf) | 0.79       | 3.20      |
|                         | Long-trips while chick rearing (oceanic)   | 0.77       | 2.02      |
|                         | Together                                   | 0.74       | 2.07      |
| Flatback turtle         | Inter-nesting                              | 0.50       | 1.71      |
|                         | Migrating                                  | 0.92       | 1.19      |
|                         | Foraging                                   | 0.75       | 1.73      |
|                         | Together                                   | 0.83       | 1.77      |

*Supporting information for accessing the datasets used in this publication.*

Greyed rows indicate species not included in the analysis (GLS data or not enough positions to perform analysis).

| Common name             | Information for data access                                                                                                                                                                                                                                                                                                                                                                            | Contact person and email                         |
|-------------------------|--------------------------------------------------------------------------------------------------------------------------------------------------------------------------------------------------------------------------------------------------------------------------------------------------------------------------------------------------------------------------------------------------------|--------------------------------------------------|
| <b>Bears</b>            |                                                                                                                                                                                                                                                                                                                                                                                                        |                                                  |
| Polar bear              | U.S. Geological Survey, DOI: 10.5066/F7RV0MK4                                                                                                                                                                                                                                                                                                                                                          | Anthony Pagano<br>apagano@usgs.gov               |
| <b>Birds – Flying</b>   |                                                                                                                                                                                                                                                                                                                                                                                                        |                                                  |
| Black footed albatross  | Archived at <a href="http://www.seabirdtracking.org/">http://www.seabirdtracking.org/</a>                                                                                                                                                                                                                                                                                                              | Scott Shaffer<br>scott.shaffer@sjsu.edu          |
| Crested tern            | SARDI Aquatic Sciences, PO Box 120, Henley Beach, South Australia, 5022                                                                                                                                                                                                                                                                                                                                | Simon Goldsworthy<br>simon.goldsworthy@sa.gov.au |
|                         | Archived at SARDI Aquatic Sciences, PO Box 120, Henley Beach, South Australia, 5022. Presented in McLeay, L.J. <i>et al.</i> (2010). Fine-scale foraging behaviour and habitat use of a short-ranging seabird, the crested tern. <i>Marine Ecology Progress Series</i> 411:271-283<br><a href="http://www.int-res.com/abstracts/meps/v411/p271-283/">www.int-res.com/abstracts/meps/v411/p271-283/</a> | Lachlan McLeay<br>Lachlan.McLeay@sa.gov.au       |
| Flesh-footed shearwater | N/A                                                                                                                                                                                                                                                                                                                                                                                                    | Scott Shaffer<br>scott.shaffer@sjsu.edu          |
| Laysan albatross        | Archived at <a href="http://www.seabirdtracking.org/">http://www.seabirdtracking.org/</a>                                                                                                                                                                                                                                                                                                              | Scott Shaffer<br>scott.shaffer@sjsu.edu          |
| Short tailed shearwater | SARDI Aquatic Sciences, PO Box 120, Henley Beach, South Australia, 5022                                                                                                                                                                                                                                                                                                                                | Simon Goldsworthy<br>simon.goldsworthy@sa.gov.au |
| Sooty shearwater        | Archived at <a href="http://www.seabirdtracking.org/">http://www.seabirdtracking.org/</a>                                                                                                                                                                                                                                                                                                              | Scott Shaffer<br>scott.shaffer@sjsu.edu          |
| Western gull            | Published in: Shaffer, S.A., Cockerham, S., Warzybok, P., Bradley, R., Jahncke, J., Clatterbuck, C.A., Lucia, M., Jelincic, J., Cassell, A., Kelsey, E.C., and Adams, J. (in press) Population-level plasticity in foraging behavior of western gulls ( <i>Larus occidentalis</i> ). <i>Movement Ecology</i> .                                                                                         | Scott Shaffer<br>scott.shaffer@sjsu.edu          |
| <b>Birds – Swimming</b> |                                                                                                                                                                                                                                                                                                                                                                                                        |                                                  |

|                               |                                                                                                                                                                                                                                                                                     |                                                  |
|-------------------------------|-------------------------------------------------------------------------------------------------------------------------------------------------------------------------------------------------------------------------------------------------------------------------------------|--------------------------------------------------|
| Emperor penguin               | N/A                                                                                                                                                                                                                                                                                 | Barbara Weinecke<br>Barbara.Wienecke@aad.gov.au  |
| King penguin                  | <a href="http://south-atlantic-research.org/ims-gis">http://south-atlantic-research.org/ims-gis</a>                                                                                                                                                                                 | Alastair Baylis<br>ammabaylis@gmail.com          |
| Little penguin                | South Australian tracks: SARDI Aquatic Sciences, PO Box 120, Henley Beach, South Australia, 5022                                                                                                                                                                                    | Simon Goldsworthy<br>simon.goldsworthy@sa.gov.au |
| Macaroni penguin              | N/A                                                                                                                                                                                                                                                                                 | Mark Hindell<br>Mark.hindell@utas.edu.au         |
| <b>Cetaceans</b>              |                                                                                                                                                                                                                                                                                     |                                                  |
| Beluga                        | Maurice Lamontagne Institute / Fisheries and Ocean Canada, 850 route de la Mer, Mont-Joli, Quebec G5H 3Z4, Canada                                                                                                                                                                   | Mike Hammill<br>Mike.Hammill@dfo-mpo.gc.ca       |
| Bottlenose dolphin            | Published in part: Wells, R.S. <i>et al.</i> 2013. Evaluation of potential protective factors against metabolic syndrome in bottlenose dolphins: Feeding and activity patterns of dolphins in Sarasota Bay, Florida. <i>Front. Endocrinol.</i> 4:139. DOI: 10.3389/fendo.2013.00139 | Randall Wells<br>rwells@mote.org                 |
| Franciscana/ La plata dolphin | N/A                                                                                                                                                                                                                                                                                 | Randall Wells<br>rwells@mote.org                 |
| Humpback whale                | Data are available by contacting the author/contributor                                                                                                                                                                                                                             | Ari Friedlaender:<br>ari.friedlaender@ucsc.edu   |
| Pilot whale                   | Published in part: Wells, R. S. <i>et al.</i> 2013. Movements and dive patterns of short-finned pilot whales, <i>Globicephala macrorhynchus</i> , released from a mass stranding in the Florida Keys. <i>Aquatic Mammals</i> 39(1): 61-72.                                          | Randall Wells<br>rwells@mote.org                 |
| Risso's dolphin               | N/A                                                                                                                                                                                                                                                                                 | Randall Wells<br>rwells@mote.org                 |
| Rough-toothed dolphin         | N/A                                                                                                                                                                                                                                                                                 | Randall Wells<br>rwells@mote.org                 |
| Southern Right whale          | SARDI Aquatic Sciences, PO Box 120, Henley Beach, South Australia, 5022                                                                                                                                                                                                             | Simon Goldsworthy<br>simon.goldsworthy@sa.gov.au |
| <b>Pinnipeds – True seals</b> |                                                                                                                                                                                                                                                                                     |                                                  |

|                                |                                                                                                                      |                                                                                        |
|--------------------------------|----------------------------------------------------------------------------------------------------------------------|----------------------------------------------------------------------------------------|
| Crabeater seal                 | Antarctic Peninsula tracks: UCSC, Santa Cruz, CA 95060                                                               | Daniel Costa<br>costa@ucsc.edu                                                         |
| Northern Elephant seal         | UCSC, Santa Cruz, CA 95060                                                                                           | Patrick Robinson<br>patrick.robinson@ucsc.edu<br>Daniel Costa<br>costa@ucsc.edu        |
| Southern Elephant seal         | <a href="https://portal.aodn.org.au/">https://portal.aodn.org.au/</a>                                                | Rob Harcourt<br>robert.harcourt@mq.edu.au                                              |
|                                | Antarctic Peninsula, UCSC Santa Cruz, CA 95060                                                                       | Daniel Costa<br>costa@ucsc.edu                                                         |
|                                | MEOP-CTD database publicly accessible through the MEOP data portal ( <a href="http://meop.net">http://meop.net</a> ) | Monica Muelbert<br>monica.muelbert@furg.br<br>Mark Hindell<br>Mark.hindell@utas.edu.au |
| Weddell seal                   | Ross Sea, UCSC Santa Cruz, CA 95060                                                                                  | Daniel Costa<br>costa@ucsc.edu                                                         |
|                                | <a href="https://portal.aodn.org.au/">https://portal.aodn.org.au/</a>                                                | Rob Harcourt<br>robert.harcourt@mq.edu.au                                              |
| <b>Pinnipeds – Eared seals</b> |                                                                                                                      |                                                                                        |
| Antarctic fur seal             | IMAS, University of Tasmania                                                                                         | Mary-Anne Lea<br>MaryAnne.Lea@utas.edu.au                                              |
| Australian fur seal            | UCSC Santa Cruz, CA 95060                                                                                            | Daniel Costa<br>costa@ucsc.edu                                                         |
| Australian sea lion            | SARDI Aquatic Sciences, PO Box 120, Henley Beach, South Australia, 5022                                              | Simon Goldsworthy<br>simon.goldsworthy@sa.gov.au                                       |
|                                | <a href="https://portal.aodn.org.au/">https://portal.aodn.org.au/</a>                                                | Rob Harcourt<br>robert.harcourt@mq.edu.au                                              |
| California sea lion            | ATN Data Assembly Centre: <a href="http://oceanview.pfeg.noaa.gov/ATN/">http://oceanview.pfeg.noaa.gov/ATN/</a>      | Michael Weise<br>michael.j.weise@navy.mil                                              |
|                                | UCSC Santa Cruz, CA 95060                                                                                            | Elizabeth McHuron<br>emchuron@ucsc.edu                                                 |

|                               |                                                                                                                                                   |                                                       |
|-------------------------------|---------------------------------------------------------------------------------------------------------------------------------------------------|-------------------------------------------------------|
|                               | UCSC Santa Cruz, CA 95060                                                                                                                         | Daniel Costa<br>costa@ucsc.edu                        |
| Cape fur seal                 | UCSC Santa Cruz, CA 95060                                                                                                                         | Daniel Costa<br>costa@ucsc.edu                        |
| Galapagos sea lion            | UCSC Santa Cruz, CA 95060                                                                                                                         | Stella Villegas-Amtmann:<br>stella.villegas@gmail.com |
| Long-nosed fur seal           | SARDI Aquatic Sciences, PO Box 120, Henley Beach, South Australia, 5022                                                                           | Simon Goldsworthy<br>simon.goldsworthy@sa.gov.au      |
|                               | <a href="https://portal.aodn.org.au/">https://portal.aodn.org.au/</a>                                                                             | Rob Harcourt<br>robert.harcourt@mq.edu.au             |
| New Zealand sea lion          | N/A                                                                                                                                               | Mark Hindell<br>Mark.hindell@utas.edu.au              |
| Northern fur seal             | IMAS, University of Tasmania                                                                                                                      | Mary-Anne Lea<br>MaryAnne.Lea@utas.edu.au             |
| Southern sea lion             | <a href="http://south-atlantic-research.org/ims-gis">http://south-atlantic-research.org/ims-gis</a>                                               | Alastair Baylis<br>ammabaylis@gmail.com               |
| <b>Sharks (Elasmobranchs)</b> |                                                                                                                                                   |                                                       |
| Blacktip shark                | N/A                                                                                                                                               | Neil Hammerschlag/<br>nhammerschlag@miami.edu         |
| Blue shark                    | Not publicly archived                                                                                                                             | Nuno Queiroz<br>nuno.queiroz@cibio.up.pt              |
| Bull shark                    | CRIOBE USR3278, PO Box 1013 Papetoai, French Polynesia                                                                                            | Eric Clua<br>Eric.clua@univ-perp.fr                   |
|                               | Data archived in seaturtle.org and published in Hammerschlag <i>et al.</i> 2012 (PLOS ONE), Graham <i>et al.</i> 2016 (Diversity & Distributions) | Neil Hammerschlag/<br>nhammerschlag@miami.edu         |
| Great hammerhead shark        | Data archived in seaturtle.org and published in Graham <i>et al.</i> 2016 (Diversity & Distributions)                                             | Neil Hammerschlag/<br>nhammerschlag@miami.edu         |
| Mako shark                    | Data archived in seaturtle.org and published in Queiroz <i>et al.</i> 2016 (PNAS)                                                                 | Neil Hammerschlag/<br>nhammerschlag@miami.edu         |
| Manta ray                     | N/A                                                                                                                                               | Camrin Braun<br>cbraun@whoi.edu                       |

|                            |                                                                                                                                                                                                                                                                                                                                                                                                                   |                                                 |
|----------------------------|-------------------------------------------------------------------------------------------------------------------------------------------------------------------------------------------------------------------------------------------------------------------------------------------------------------------------------------------------------------------------------------------------------------------|-------------------------------------------------|
| Scalloped hammerhead shark | Data archived in seaturtle.org and published in Queiroz <i>et al.</i> 2016 (PNAS)                                                                                                                                                                                                                                                                                                                                 | Neil Hammerschlag/<br>nhammerschlag@miami.edu   |
| Silky shark                | N/A                                                                                                                                                                                                                                                                                                                                                                                                               | Neil Hammerschlag/<br>nhammerschlag@miami.edu   |
| Tiger shark                | CRIOBE USR3278, PoBox 1013 Papetoai, French Polynesia                                                                                                                                                                                                                                                                                                                                                             | Eric Clua<br>Eric.clua@univ-perp.fr             |
|                            | Data archived in seaturtle.org and published in Hammerschlag <i>et al.</i> 2015 (Ecology) and Graham <i>et al.</i> 2016 (Diversity & Distributions)                                                                                                                                                                                                                                                               | Neil Hammerschlag/<br>nhammerschlag@miami.edu   |
| Whale shark                | Data archive of the Australian Institute of Marine Science, Western Australia 6009, Australia                                                                                                                                                                                                                                                                                                                     | Mark G. Meekan<br>M.Meekan@aims.gov.au          |
|                            | N/A                                                                                                                                                                                                                                                                                                                                                                                                               | Camrin Braun<br>cbraun@whoi.edu                 |
| <b>Sirenians</b>           |                                                                                                                                                                                                                                                                                                                                                                                                                   |                                                 |
| Dugong                     | <a href="https://researchdata.andis.org.au/bluenet/678609">https://researchdata.andis.org.au/bluenet/678609</a>                                                                                                                                                                                                                                                                                                   | Richard Campbell<br>Richard.Campbell@nlc.org.au |
| West Indian manatee        | A. Aven and Carmichael, R.H. (2017). GPS tracking of West Indian manatees ( <i>Trichechus manatus latirostris</i> ) tagged in Mobile Bay, Alabama (2009-2015). Dauphin Island Sea Lab: Data Management Centre. Available at <a href="http://cf.disl.org/datamanagement/metadata_folder/DISL-Carmichael-Aven-001-2017.xml">http://cf.disl.org/datamanagement/metadata_folder/DISL-Carmichael-Aven-001-2017.xml</a> | Ruth Carmichael<br>rcarmichael@disl.org         |
| <b>Turtles</b>             |                                                                                                                                                                                                                                                                                                                                                                                                                   |                                                 |
| Flatback turtle            | Australian Institute of Marine Science, Western Australia 6009, Australia                                                                                                                                                                                                                                                                                                                                         | Michele Thums<br>M.Thums@aims.gov.au            |
| Green turtle               | Indian Ocean tracks, Deakin University, Victoria Australia                                                                                                                                                                                                                                                                                                                                                        | Graeme Hays<br>g.hays@deakin.edu.au             |
|                            |                                                                                                                                                                                                                                                                                                                                                                                                                   | Michele Thums<br>M.Thums@aims.gov.au            |
| Leatherback turtle         | Atlantic tracks, Deakin University, Victoria Australia                                                                                                                                                                                                                                                                                                                                                            | Graeme Hays<br>g.hays@deakin.edu.au             |
| Loggerhead turtle          | Mediterranean tracks, Deakin University, Victoria Australia                                                                                                                                                                                                                                                                                                                                                       | Graeme Hays<br>g.hays@deakin.edu.au             |



## Supporting References

1. McConnell BJ, Chambers C, & Fedak MA (1992) Foraging Ecology of Southern Elephant Seals in Relation to the Bathymetry and Productivity of the Southern-Ocean. *Antarct Sci* 4(4):393-398.
2. Johnson DS, London JM, Lea MA, & Durban JW (2008) Continuous-time correlated random walk model for animal telemetry data. *Ecology* 89(5):1208-1215.
3. Jonsen ID, *et al.* (2013) State-space models for bio-loggers: A methodological road map. *Deep-Sea Res Pt II* 88-89:34-46.
4. Brockmann D, Hufnagel L, & Geisel T (2006) The scaling laws of human travel. *Nature* 439(04292):462-465.
5. Elith J, Leathwick JR, & T. H (2008) A working guide to boosted regression trees. *Journal of Animal Ecology* 77(4):802 - 813.
6. R Core Team (2016) R: A language and environment for statistical computing. R Foundation for Statistical Computing; Vienna, Austria. ISBN 3-900051-07-0, URL <http://www.R-project.org/>.
7. Saitou N & Nei M (1987) The Neighbor-Joining Method - a New Method for Reconstructing Phylogenetic Trees. *Mol Biol Evol* 4(4):406-425.
8. Pagano AM, *et al.* (in press) High energy-high fat lifestyle challenges an Arctic apex predator, the polar bear. *Science*.
9. Shaffer SA (2011) A review of seabird energetics using the doubly labeled water method. *Comparative Biochemistry and Physiology a-Molecular & Integrative Physiology* 158(3):315-322.
10. Perez MA & McAlister WB (1993) Estimates of food consumption by marine mammals in the Eastern Bering Sea. pp U.S. Dep. Commer., NOAA Tech. Memo. NMFS-AFSC-14, 36 p.
11. Lockyer C (2007) All creatures great and smaller: a study in cetacean life history energetics. *J Mar Biol Assoc Uk* 87(4):1035-1045.
12. Krockenberger MB & Bryden MM (1993) Energy-Intake of Immature Southern Elephant Seals, Mirounga-Leonina (Carnivora, Phocidae). *Australian Journal of Zoology* 41(6):589-597.
13. Goldsworthy SD, Bulman CM, He M-X, Larcombe JWP, & Littnan C (2003) Trophic interactions between marine mammals and Australian fisheries: an ecosystem approach. *Marine mammals: fisheries, tourism and management issues.*, eds Gales NJ, Hindell MA, & Kirkwood R (CSIRO Publishing, Collingwood, Victoria), pp 62-99.
14. Goldsworthy SD, *et al.* (2013) Trophodynamics of the eastern Great Australian Bight ecosystem: Ecological change associated with the growth of Australia's largest fishery. *Ecological Modelling* 255:38-57.
15. McHuron EA, Mangel M, Schwarz LK, & Costa DP (2017) Energy and prey requirements of California sea lions under variable environmental conditions. *Marine Ecology Progress Series* 567:235-247.
16. Mecenero S, Kirkman SP, & Roux JP (2006) A refined fish consumption model for lactating Cape fur seals (*Aretocephalus pusillus pusillus*), based on scat analyses. *Ices Journal of Marine Science* 63(8):1551-1566.
17. Villegas-Amtmann S, McDonald BI, Paez-Rosas D, Auriolles-Gamboa D, & Costa DP (2017) Adapted to change: Low energy requirements in a low and unpredictable productivity environment, the case of the Galapagos sea lion. *Deep-Sea Res Pt II* 140:94-104.

18. Winship AJ, Hunter AMJ, Rosen DAS, & Trites AW (2006) Food consumption by sea lions: Existing data and techniques. *Low Wake Fi*:177-191.
19. Dalton AJM, Rosen DAS, & Trites AW (2015) Resting metabolic rate and activity: key components of seasonal variation in daily energy expenditure for the northern fur seal (*Callorhinus ursinus*). *Canadian Journal of Zoology* 93(8):635-644.
20. Schmid TH & Murru FL (1994) Bioenergetics of the Bull Shark, *Carcharhinus-Leucas*, Maintained in Captivity. *Zoo Biol* 13(2):177-185.
21. Lowe CG (2002) Bioenergetics of free-ranging juvenile scalloped hammerhead sharks (*Sphyrna lewini*) in Kane'ohe Bay, O'ahu, HI. *Journal of Experimental Marine Biology and Ecology* 278(2):141-156.
22. Hammerschlag N, Gallagher AJ, & Carlson JK (2013) A revised estimate of daily ration in the tiger shark with implication for assessing ecosystem impacts of apex predators. *Funct Ecol* 27(5):1273-1274.
23. Motta PJ, *et al.* (2010) Feeding anatomy, filter-feeding rate, and diet of whale sharks *Rhincodon typus* during surface ram filter feeding off the Yucatan Peninsula, Mexico. *Zoology* 113:190-212.
24. Best RC (1981) Foods and feeding habits of wild and captive Sirenia. *Mammal Review* 11(1):3.
25. McCauley SJ & Bjorndal KA (1999) Conservation implications of dietary dilution from debris ingestion: Sublethal effects in post-hatchling loggerhead sea turtles. *Conservation Biology* 13(4):925-929.
26. Gilbert EI (1998) Juvenile Green Turtle (*Chelonia mydas*) foraging ecology: feeding selectivity and forage nutrient analysis. PhD Thesis (Department of Biology; University of Central Florida, Orlando, Florida).
27. Heaslip SG, Iverson SJ, Bowen WD, & James MC (2012) Jellyfish Support High Energy Intake of Leatherback Sea Turtles (*Dermochelys coriacea*): Video Evidence from Animal-Borne Cameras. *Plos One* 7(3).
